# Supplementary material for: Haplotype of non-synonymous mutations within IL-23R is associated with susceptibility to severe malaria anemia in a P. falciparum holoendemic transmission area of Kenya
Source: BMC Infect Dis. 2017 Apr 20;17:291. doi: 10.1186/s12879-017-2404-y (PMC5397818; doi:10.1186/s12879-017-2404-y)
Supplement: Additional file 1: — These are details of the raw data for the study participants (N = 369) used in the analyses of results presented in the current paper. (XLS 384 kb) [file 12879_2017_2404_MOESM1_ESM.xls]

## Sheet: IL-23R DATASET 11-04-2017
Serial_No	IL-23R rs1884444	rs7530511	IL-23R rs1884444	rs7530511	HAP1	HAP2	TT	TC	GT	GC	Sex_Code	Age_CODES	Day	MPS/µL	PigmentM	PigmentN	Hgb (g/dL)	Hct	SMA Hb<5 g/dL	SMA6 (Hb<6.0G/dL)	Glucose	WBC (x10^3/uL)	LY (%)	MO (%)	GR (%)	LY.	MO.	GR.	RBC (x10^12/L)	MCV	MCH	MCHC	RDW	Plt	L	N	M	E	Thrombocytopenia (+)	MPV	Pct	PDW	Retic Number	ReticCount (%)	ReticIndex	RPI	RPI<2	OrganismIsolated	Bacteremia (+)
124	GT	CT	2	2	GC	TT	1	2	2	1	1	0	0	365.7	1	1	5.5	17.3	0	1		5.2	47.9	14	38.1	2.5	0.7	2	3.23	53.5	16.9	31.5	25.1	168	62	29	9	0	0	14.3	0.24	14.7	4	0.4	0.226885	0.113443	1	NGO	0
311	GG	CC	3	3	GC	GC	2	2	2	1	0	0	0	62478	6	0	5.6	19.5	0	1	4.16	12.1	31.2	7.7	61.1	3.8	0.9	7.4	2.67	73.1	21	28.7	23.6	80	33	62	5	0	1	8.5	0.068	18.1	52	5.2	3.32459	1.6623	1	NGO	0
214	GG	CC	3	3	GC	GC	2	2	2	1	0	0	0	15032.1	3	0	11.2	34.4	0	0	4.4	25.3	22.3	9.9	67.8	5.6	2.5	17.2	4.34	79.3	25.8	32.5	15.6	219	30	69	1	0	0	7.4	0.162	16.8	11	1.1	1.24066	0.620328	0	NGO	0
61	GG	CC	3	3	GC	GC	2	2	2	1	1	0	0	63359.1	0	0	8.7	23.7	0	0		20.7	53.2	6.3	40.5	11	1.3	8.4	2.99	79.1	29.1	36.9	17	129	60	38	2	0	1	9.2	0.119	17	41	4.1	3.1859	1.59295	1	NGO	0
39	GT	TT	2	1	GT	TT	1	2	1	2	1	0	0	31200	0	0	10.2	33.5	0	0	4.5	7.2	45.5	6.7	47.8	3.3	0.5	3.4	4.29	78.1	23.8	30.5	18.8	239					0	5.5	0.132	16.8	11	1.1	1.2082	0.604098	1	NGO	0
60	GG	CC	3	3	GC	GC	2	2	2	1	1	0	0	934.5	0	0	8.8	28	0	0		10.4	55.9	11.1	33	5.8	1.2	3.4	3.6	77.9	24.6	31.5	19.2	73	68	30	2	0	1	-1	0.076	17.8	20	2	1.83607	0.918033	1	Gram positive rods	0
277	GG	CC	3	3	GC	GC	2	2	2	1	0	0	0	9879	0	0	7.8	23.7	0	0		13.6	40.5	5.1	54.4	5.5	0.7	7.4	3.6	66	21.8	33	19.7	142	44	55	1	0	1	9.1	0.13	17.5	49	4.9	3.80754	1.90377	1	NGO	0
3	GG	CC	3	3	GC	GC	2	2	2	1	1	0	0	5864	0	0	12.6	37.6	0	0	4.4	10.5	63.6	7.4	29	6.7	0.8	3	4.63	81.3	27.3	33.6	13.5	560	69	31	0	0	0	6.8	0.383	17	17	1.7	2.09574	1.04787	0	NGO	0
15	GG	CC	3	3	GC	GC	2	2	2	1	1	0	0	12453	0	0	11.5	34	0	0	5.2	10.8	75.3	6.5	18.2	8.1	0.7	2	4.22	80.6	27.4	34	13.1	313	77	21	2	0	0	7.8	0.245	17.1	30	3	3.34426	1.67213	0	NGO	0
175	GG	CC	3	3	GC	GC	2	2	2	1	1	0	0	13323.3	7	0	4.1	13.2	1	1	3.1	16.2	39.8	14.3	45.9	6.4	2.3	7.4	1.66	79.2	24.8	31.3	23.7	136	40	45	11	4	1	8.7	0.119	16.9	22	2.2	0.952131	0.476066	1	Salmonella typhimurium	1
324	GT	CC	2	3	GC	TC	2	1	2	1	0	0	0	5874	10	0	5.4	18.2	0	1	7	22.9	66.9	21	12.1	15.3	4.8	2.8	2.46	73.8	21.8	29.5	23	112	69	20	11	0	1	9.7	0.11	16.9	84	8.4	5.01246	2.50623	0	Staphylococcus aureus	1
335	GT	TT	2	1	GT	TT	1	2	1	2	0	0	0	82876.8	5	0	5	14.7	0	1	5.8	16.3	51.5	13	35.5	8.4	2.1	5.8	1.96	74.8	25.3	33.8	19.1	113	-1	-1	-1	-1	1	9.3	0.105	18.6	48	4.8	2.31344	1.15672	1	NGO	0
106	GG	CC	3	3	GC	GC	2	2	2	1	1	0	0	747.6	10	0	5.9	16.1	0	1	5.1	12.3	64.2	18.2	17.6	7.9	2.2	2.2	1.89	85	31	36.4	23.5	227	69	19	12	0	0	6.6	0.15	18.6	122	12.2	6.44	3.22	0	NGO	0
177	GT	CC	2	3	GC	TC	2	1	2	1	1	0	0	8745	0	0	4	10.9	1	1	6.8	81	72.3	12.4	15.3	58.6	10	12.4	1.08	100.9	37	36.6	35.3	177	59	25	16	0	0	7.8	0.139	18.3	217	21.7	7.75508	3.87754	0	NGO	0
315	GG	CC	3	3	GC	GC	2	2	2	1	0	0	0	18529.8	1	0	5.5	18.1	0	1		13.1	54.4	10.6	35	7.1	1.4	4.6	2.27	79.7	24.2	30.4	24.1	117	59	36	5	0	1	7.4	0.087	18.1	18	1.8	1.0682	0.534098	1	NGO	0
161	GG	CC	3	3	GC	GC	2	2	2	1	1	0	0	1014.6	0	0	4.6	16.2	1	1	3.88	14.9	60.8	18.1	21.1	9.1	2.7	3.1	1.99	81.2	23.3	28.7	29.7	109	71	24	5	0	1	9.3	0.102	17.6	20.3	2.03	1.07823	0.539115	1	NGO	0
171	GG	CC	3	3	GC	GC	2	2	2	1	1	0	0	24937.8	8	0	4.2	13.9	1	1	4.9	11.7	53.8	9.4	36.8	6.3	1.1	4.3	1.57	88.2	27	30.6	14.6	94	50	48	2	0	1	8.3	0.078	17.3	41	4.1	1.86852	0.934262	1	NGO	0
367	GG	CC	3	3	GC	GC	2	2	2	1	0	0	0	27848.1	7	8	2.9	7.9	1	1	6.7	19.9	57.6	7.2	35.2	11.5	1.4	7	1.07	73.4	27.4	37.3	19.5	170	62	36	2	0	0	9.2	0.157	19.1	6	0.6	0.15541	0.0777049	1	NGO	0
223	GG	CC	3	3	GC	GC	2	2	2	1	0	0	0	160.2	0	0	11	31.3	0	0		9.4	59.1	6.6	34.3	5.6	0.6	3.2	4	78.4	27.5	35	13.2	334	64	35	1	0	0	7.2	0.242	16.9	27	2.7	2.77082	1.38541	0	NGO	0
233	GG	CC	3	3	GC	GC	2	2	2	1	0	0	0	453.9	0	0	10.2	31.7	0	0	4.88	6.4	45.8	6	48.2	2.9	0.4	3.1	4.2	75.6	24.4	32.3	17	230	47	53	0	0	0	7.4	0.171	16.6	26	2.6	2.7023	1.35115	1	Staphylococcus aureus	1
366	GG	CC	3	3	GC	GC	2	2	2	1	0	0	0	5793.9	2	0	3	10	1	1	8.7	23.8	71.8	18.1	10.1	17.1	4.3	2.4	1.12	89.6	27	30.2	27.6	156	77	16	6	1	0	7.9	0.124	17.3	67	6.7	2.19672	1.09836	1	NGO	0
108	GG	CC	3	3	GC	GC	2	2	2	1	1	0	0	889	0	0	5.9	17.6	0	1	7.7	10.7	35.1	1.4	63.5	3.8	0.1	6.8	2.55	69.1	23	33.3	19.1	398	41	59	0	0	0	7.1	0.284	18.5	4	0.4	0.23082	0.11541	1	Salmonella typhimurium	1
268	GT	CT	2	2	GC	TT	1	2	2	1	0	0	0	10413	0	0	8.3	27.9	0	0	5.38	23.2	62.1	17	20.9	14.4	3.9	4.8	4.09	68.3	20.3	29.7	17.4	232	79	21	0	0	0	8.7	0.203	17.6	48	4.8	4.39082	2.19541	0	NGO	0
139	GT	CC	2	3	GC	TC	2	1	2	1	1	0	0	91260.6	0	0	5.1	16.4	0	1		13.2	51.4	14.4	34.2	6.8	1.9	4.5	2.26	72.5	22.5	31.1	19.9	246	56	38	6	0	0	7.6	0.188	18.1	113	11.3	6.07607	3.03803	0	NGO	0
198	GG	CC	3	3	GC	GC	2	2	2	1	0	0	0	123	0	0	11.8	37.6	0	0	4	8.1	58.6	12.5	28.9	4.7	1	2.3	5.6	67.1	21.1	31.4	19.8	470	64	30	6	0	0	7.5	0.354	18.6	9	0.9	1.10951	0.554754	0	NGO	0
76	GG	CC	3	3	GC	GC	2	2	2	1	1	0	0	18983.7	6	0	7.3	23.3	0	0		14.8	53.2	14.5	32.3	7.9	2.1	4.8	3.44	67.8	21.2	31.4	21.8	302	59	35	6	0	0	9.1	0.276	18.5	68	6.8	5.19475	2.59738	0	NGO	0
278	GG	CC	3	3	GC	GC	2	2	2	1	0	0	0	128694	7	0	7.7	23.7	0	0		20.8	32.8	6	61.2	6.8	1.2	12.7	3.35	70.6	22.9	32.5	19.6	86	38	62	0	0	1	8.4	0.072	15.8	7	0.7	0.543934	0.271967	1	NGO	0
27	GG	CC	3	3	GC	GC	2	2	2	1	1	0	0	59487.6	0	0	11.1	31.8	0	0		12.2	42.2	11.5	46.3	5.1	1.4	5.6	4.45	71.5	24.9	34.9	13.5	163	48	49	3	0	0	9.6	0.158	19	17	1.7	1.77246	0.88623	0	NGO	0
43	GG	CT	3	2	GC	GT	2	2	1	1	1	0	0	1094.7	0	0	10	27.4	0	0	4.9	12	70.4	8.8	20.8	8.4	1.1	2.5	4	68.7	25.1	36.6	15.9	332	70	22	6	1	0	10.9	0.36	18.2	51	5.1	4.58164	2.29082	0	NGO	0
140	GG	CC	3	3	GC	GC	2	2	2	1	1	0	0	37940.7	0	0	5.1	14.3	0	1	3.8	13.4	60.9	3.7	35.4	8.2	0.5	4.7	1.93	74	26.3	35.5	19.7	100	63	32	5	0	1	8.4	0.085	17	21	2.1	0.98459	0.492295	1	NGO	0
258	GT	TT	2	1	GT	TT	1	2	1	2	0	0	0	133.5	0	0	8.7	26.3	0	0		8.5	61.5	10.3	28.2	5.2	0.9	2.4	4.1	64.1	21.2	33.1	18.7	72	66	30	4	0	1	9.9	0.071	18.4	2	0.2	0.172459	0.0862295	1	NGO	0
87	GG	CC	3	3	GC	GC	2	2	2	1	1	0	0	146076	0	0	6.8	20.7	0	0	5.8	11.7	60.1	10.3	29.6	7	1.2	3.5	3.46	59.8	19.6	32.8	24.6	171	65	31	3	1	0	9.8	0.168	18.6	39	3.9	2.64689	1.32344	1	NGO	0
194	GT	CC	2	3	GC	TC	2	1	2	1	0	0	0	4583	0	0	12.2	36	0	0	4.83	10.1	75.8	8.5	15.7	7.7	0.9	1.6	4.82	74.7	25.3	33.8	15.2	553	80	17	3	0	0	6.2	0.345	16.9	9	0.9	1.0623	0.531148	0	NGO	0
95	GG	CC	3	3	GC	GC	2	2	2	1	1	0	0	18556.5	8	0	6.2	16.8	0	0	5.9	13.1	70	10.5	19.5	9.2	1.4	2.6	2.13	78.8	29.3	37.1	20.6	50	73	22	5	0	1	8.2	0.041	19.4	21	2.1	1.15672	0.578361	1	Pseudomonas aeroginosa	1
12	GG	CC	3	3	GC	GC	2	2	2	1	1	0	0	55	0	0	11.6	34.7	0	0	3.9	9.9	63.4	5.6	31	6.3	0.6	3.1	4.46	77.8	26.1	33.5	13.4	654	69	31	0	0	0	7.8	0.513	16.8	6	0.6	0.682623	0.341311	0	Staphylococcus aureus	1
181	GG	CC	3	3	GC	GC	2	2	2	1	1	0	0	36525.6	13	0	3.4	10.6	1	1	5.4	10.7	50.7	15.1	34.2	5.4	1.6	3.7	1.23	86.1	27.6	32	24.2	110	52	41	7	0	1	9.1	0.1	18.1	55	5.5	1.91148	0.955738	1	NGO	0
316	GG	CC	3	3	GC	GC	2	2	2	1	0	0	0	15913.2	4	0	5.5	15.2	0	1	4	27.8	47.4	7	45.6	13.2	1.9	12.7	2.42	62.9	22.8	36.2	14.4	79	54	39	5	2	1	10.7	0.085	19.2	16	1.6	0.797377	0.398689	1	NGO	0
127	GT	CT	2	2	GC	TT	1	2	2	1	1	0	0	267	0	0	5.4	16.2	0	1	8.4	4	21	6.2	72.8	0.8	0.2	2.9	2.5	64.6	21.5	33.2	23.4	6	25	75	0	0	1		0.005		4	0.4	0.212459	0.10623	1	Salmonella typhimurium	1
88	GT	CC	2	3	GC	TC	2	1	2	1	1	0	0	7022.1	0	0	6.8	22	0	0		14.6	48.5	9.3	42.2	7.1	1.4	6.2	2.68	82.2	25.5	31	19.8	223	52	44	4	0	0	6.1	0.136	17.9	41	4.1	2.95738	1.47869	1	Salmonella typhimurium	1
265	GG	CT	3	2	GC	GT	2	2	1	1	0	0	0	3337.5	0	0	8.4	25.6	0	0		7.6	47.5	5.8	46.7	3.6	0.4	3.5	3.8	67.4	22.1	32.9	15.5	50	52	47	1	0	1	10.7	0.053	15.2	13	1.3	1.09115	0.545574	1	NGO	0
276	GG	TT	3	1	GT	GT	2	2	1	2	0	0	0	53.4	0	0	7.9	24.9	0	0	4.3	17.8	69.9	4.4	25.7	12.4	0.8	4.6	3.91	63.6	20.2	31.7	22.6	347	71	27	1	1	0	8.1	0.283	18.4	33	3.3	2.6941	1.34705	1	NGO	0
28	GT	CT	2	2	GC	TT	1	2	2	1	1	0	0	899	0	0	11.1	33.3	0	0	5.33	14.3	78.8	5.4	15.8	11.3	0.8	2.3	4.88	68.2	22.7	33.3	17.9	269	83	16	1	0	0	7.7	0.208	17.7	7	0.7	0.764262	0.382131	0	NGO	0
166	GG	CC	3	3	GC	GC	2	2	2	1	1	0	0	12522.5	0	0	4.5	14.3	1	1		11.7	52.3	15	32.7	6.1	1.8	3.8	1.73	83	26	31.3	23.1	182	60	33	7	0	0	8.8	0.161	17.9	25	2.5	1.17213	0.586066	1	NGO	0
197	GT	CC	2	3	GC	TC	2	1	2	1	0	0	0	256	0	0	11.9	35	0	0	4.89	6.5	74.4	5.6	20	4.8	0.4	1.3	4.92	71.1	24.2	34	13.4	464	79	21	0	0	0	7.5	0.35	17.3	6	0.6	0.688525	0.344262	0	NGO	0
309	GG	CC	3	3	GC	GC	2	2	2	1	0	0	0	12	0	0	5.7	20.1	0	1	1.9	9.8	21.7	3	75.3	2.1	0.3	7.4	2.43	82.8	23.4	28.3	24.8	255	26	68	4	2	0	7.1	0.182	16.2	8	0.8	0.527213	0.263607	1	Streptococcus pneumoniae	1
262	GT	CC	2	3	GC	TC	2	1	2	1	0	0	0	1228.2	0	0	8.5	23.8	0	0		9.1	64.9	7.6	27.5	5.9	0.7	2.5	3.6	66.1	23.5	35.6	18.1	397	74	25	1	0	0	7.1	0.283	16.6	12	1.2	0.936393	0.468197	1	NGO	0
119	GG	CC	3	3	GC	GC	2	2	2	1	1	0	0	70060.8	20	0	5.6	16.9	0	1	4.6	15.8	55.4	16.2	28.4	8.8	2.6	4.5	2.44	69.2	22.9	33.1	23.8	128	59	30	11	0	1	12.7	0.162	18.2	123	12.3	6.81541	3.4077	0	NGO	0
294	GG	CC	3	3	GC	GC	2	2	2	1	0	0	0	74706.6	8	0	6	19.7	0	0	6	12.6	68	12.3	19.7	8.6	1.5	2.5	2.22	88.6	27	30.5	22.2	72	67	18	15	0	1	9.3	0.068	18.3	94	9.4	6.07148	3.03574	0	NGO	0
346	GG	CC	3	3	GC	GC	2	2	2	1	0	0	0	87148.8	18	0	4.7	14.2	1	1	7.3	15.1	41.7	13.3	45	6.3	2	6.8	2	70.9	23.4	33	19.5	128	43	47	9	1	1	8.7	0.112	16.1	25	2.5	1.16393	0.581967	1	Staphylococcus sp.	1
131	GG	CC	3	3	GC	GC	2	2	2	1	1	0	0	3204	6	0	5.3	17.4	0	1	4.7	6	48	15.7	36.3	2.9	0.9	2.2	2.9	60.2	18.2	30.2	25.6	117	51	45	4	0	1	10.9	0.127	17.5	40	4	2.28197	1.14098	1	NGO	0
144	GG	CC	3	3	GC	GC	2	2	2	1	1	0	0	125.3	0	0	5	15.2	0	1	6.3	16.6	57.9	14.4	27.7	9.6	2.4	4.6	2.34	64.8	21.5	33.3	28.1	222	50	38	11	1	0	9.1	0.203	20	49	4.9	2.44197	1.22098	1	Staphylococcus aureus	1
92	GG	CC	3	3	GC	GC	2	2	2	1	1	0	0	39462.6	0	0	6.3	18.6	0	0		5.7	60.6	8.9	30.5	3.5	0.5	1.7	2.84	65.6	22	33.6	17.1	159	67	32	1	0	0	8.8	0.141	18.1	17	1.7	1.03672	0.518361	1	NGO	0
164	GG	CT	3	2	GC	GT	2	2	1	1	1	0	0	30571.5	9	0	4.5	13	1	1	5.87	14.9	49.6	11.8	38.6	7.4	1.8	5.8	1.91	68.3	23.4	34.2	21.8	265	54	40	5	1	0	7.8	0.207	18.5	25	2.5	1.06557	0.532787	1	NGO	0
41	GT	CC	2	3	GC	TC	2	1	2	1	1	0	0	123	0	0	10.1	28.6	0	0		9.3	55.4	7.8	36.8	5.2	0.7	3.4	4.01	71.4	25.1	35.2	14.3	289	70	30	0	0	0	6.3	0.183	18	8	0.8	0.750164	0.375082	1	NGO	0
168	GG	CC	3	3	GC	GC	2	2	2	1	1	0	0	1468.5	13	3	4.4	12.3	1	1	4.2	16	60.5	20.5	19	9.7	3.3	3	1.6	76.5	27.3	35.7	33.3	148	63	27	8	2	1	8.1	0.12	18.5	172	17.2	6.93639	3.4682	0	NGO	0
325	GT	CC	2	3	GC	TC	2	1	2	1	0	0	0	5767.2	0	0	5.4	19	0	1	5.33	29.6	45	11	44	13.3	3.3	13	2.43	78	22.2	28.4	24.8	259	50	44	4	2	0	8.8	0.229	16.9	15	1.5	0.934426	0.467213	1	NGO	0
344	GG	CC	3	3	GC	GC	2	2	2	1	0	0	0	3097.2	0	0	4.8	16.8	1	1	4.72	2.4	73.8	16.8	9.4	1.8	0.4	0.2	2.87	58.6	16.8	28.7	36.5	57	71	24	5	0	1	7.8	0.044	13.2	29	2.9	1.59738	0.798689	1	NGO	0
187	GT	CT	2	2	GC	TT	1	2	2	1	1	0	0	12148.5	22	2	3	9	1	1	11.9	39.3	31.8	8	60.2	12.5	3.1	23.7	1.18	75.9	25.4	33.4	22.2	83	35	59	6	0	1	9.6	0.08	19.1	98	9.8	2.8918	1.4459	1	NGO	0
107	TT	CT	1	2	TC	TT	1	1	2	2	1	0	0	13652	0	0	5.9	17.5	0	1	4.6	12.6	55.5	8.7	35.8	7	1.1	4.5	2.73	64.3	21.5	33.4	16.4	352	60	40	0	0	0	7.7	0.272	19	8	0.8	0.459016	0.229508	1	Salmonella typhimurium	1
112	GT	CC	2	3	GC	TC	2	1	2	1	1	0	0	36312	2	0	5.8	19.1	0	1	3.1	13.1	55.2	8.3	36.5	7.2	1.1	4.8	2.85	66.9	20.3	30.4	22.4	136	58	40	2	0	1	8.8	0.121	16.8	37	3.7	2.31705	1.15852	1	Salmonella typhimurium	1
37	GG	CC	3	3	GC	GC	2	2	2	1	1	0	0	15539.4	1	0	10.5	28.5	0	0	5.27	7.6	64	11	25	4.9	0.8	1.9	4.15	68.5	23.2	34.1	18.3	119	72	21	7	0	1	8.3	0.1	15.5	14	1.4	1.3082	0.654098	1	Salmonella enteridis	1
284	GT	CT	2	2	GC	TT	1	2	2	1	0	0	0	28675.8	0	0	7	21.2	0	0	4.33	11.8	72.5	9.7	17.8	8.6	1.1	2.1	3.19	66.6	22	33.1	22.1	136	79	19	2	0	1	8.1	0.11	18	56	5.6	3.89246	1.94623	1	NGO	0
145	GG	CC	3	3	GC	GC	2	2	2	1	1	0	0	95052	0	0	4.9	14.6	1	1	4.77	13.6	49.9	12	38.1	6.8	1.6	5.2	2.06	70.8	23.9	33.7	21.1	71	54	40	4	2	1	9.6	0.069	17.3	43	4.3	2.05836	1.02918	1	NGO	0
337	TT	CT	1	2	TC	TT	1	1	2	2	0	0	0	139107	6	1	4.9	14.5	1	1	6.5	6	54.7	3.5	41.8	3.3	0.2	2.5	1.87	77.3	26.2	33.9	16.9	167	51	49	0	0	0	7.8	0.131	16.6	54	5.4	2.56721	1.28361	1	NGO	0
55	GT	CC	2	3	GC	TC	2	1	2	1	1	0	0	57778.8	4	0	9	25.8	0	0		10.3	51.9	2.6	45.5	5.3	0.3	4.7	3.33	77.5	27.1	35	17.8	86	61	39	0	0	1	9	0.078	18.2	23	2.3	1.94557	0.972787	1	NGO	0
359	TT	CC	1	3	TC	TC	2	1	2	2	0	0	0	1121.4	0	0	3.7	13	1	1	4.83	17.8	34.8	9.3	55.9	6.2	1.7	10	1.91	68.1	19.4	28.4	22.3	204	40	54	6	0	0	9.8	0.201	17	32	3.2	1.36393	0.681967	1	NGO	0
85	GT	CC	2	3	GC	TC	2	1	2	1	1	0	0	1922.4	0	0	7	20.9	0	0		13.6	56.7	12.4	30.9	7.7	1.7	4.2	2.71	77	25.7	33.4	19.8	152	64	32	4	0	0	8.8	0.134	17	102	10.2	6.98951	3.49475	0	Salmonella typhimurium	1
54	GG	CC	3	3	GC	GC	2	2	2	1	1	0	0	172268	8	12	9.1	26.5	0	0		13.9	38	6.3	55.7	5.3	0.9	7.7	3.48	76.3	26.2	34.4	15.8	52	42	56	2	0	1	9.5	0.05	16.1	11	1.1	0.955738	0.477869	1	NGO	0
63	GG	CC	3	3	GC	GC	2	2	2	1	1	0	0	17488.5	5	0	8.6	26.1	0	0		12.8	63.2	10.1	26.7	8.1	1.3	3.4	4.18	62.5	20.5	32.8	18.4	102	75	22	3	0	1	10.1	0.103	17.2	8	0.8	0.68459	0.342295	1	NGO	0
333	GG	CC	3	3	GC	GC	2	2	2	1	0	0	0	1548.6	0	0	5.1	15.3	0	1	4.8	9	54.9	15.2	29.9	4.9	1.4	2.7	2.85	53.8	17.9	33.2	37.3	102	64	28	8	0	1	6.3	0.064	16.8	9	0.9	0.451475	0.225738	1	NGO	0
353	GT	CT	2	2	GC	TT	1	2	2	1	0	0	0	48888	0	0	4	13	1	1	1	9.6	41.6	5.9	52.5	4	0.6	5	1.77	73.6	22.4	30.4	29.7	133	46	49	5	0	1	9.4	0.125	17.3	20	2	0.852459	0.42623	1	Salmonella typhimurium	1
365	GT	CT	2	2	GC	TT	1	2	2	1	0	0	0	114543	7	0	3.1	11	1	1	6.2	26.8	47.2	6.6	46.2	12.6	1.8	12.4	1.5	73	20.4	27.9	25	81	43	53	4	0	1	9.1	0.074	17.5	117	11.7	4.21967	2.10984	1	Enterobacter sp.	1
51	GT	CC	2	3	GC	TC	2	1	2	1	1	0	0	961.2	0	0	9.4	28.4	0	0		9.1	68.6	6.8	24.6	6.2	0.6	2.2	4.02	70.6	23.3	33	18.4	167	72	25	3	0	0	7.8	0.131	18	15	1.5	1.39672	0.698361	1	Staphylococcus aureus	1
210	GG	CC	3	3	GC	GC	2	2	2	1	0	0	0	2567	0	0	11.4	34.3	0	0	5.3	14.4	41.5	13.1	45.4	6	1.9	6.5	5.52	62.2	20.6	33.1	14.6	388	46	43	11	0	0	8.9	0.347	16.9	14	1.4	1.57443	0.787213	0	NGO	0
318	GG	CC	3	3	GC	GC	2	2	2	1	0	0	0	69580.2	0	0	5.4	16.6	0	1		10.2	44.2	5.2	50.6	4.5	0.5	5.2	2.6	63.6	20.6	32.3	21.1	94	38	62	0	0	1	8.7	0.082	19.2	6	0.6	0.326557	0.163279	1	NGO	0
48	GG	CC	3	3	GC	GC	2	2	2	1	1	0	0	41945.7	1	1	9.5	27.5	0	0		8.2	54.5	4.5	41	4.5	0.4	3.4	3.61	76.2	26.2	34.4	19.7	118	54	36	0	0	1	7.1	0.084	18	40	4	3.60656	1.80328	0	Staphylococcus (coagulase neg)	1
336	GG	CC	3	3	GC	GC	2	2	2	1	0	0	0	46698.3	0	0	5	16.2	0	1		22.1	42.8	13.6	43.6	9.5	3	9.6	2.13	75.8	23.5	31	33.2	194	45	50	5	0	0	7.3	0.142	19.4	129	12.9	6.8518	3.4259	0	NGO	0
46	GT	CC	2	3	GC	TC	2	1	2	1	1	0	0	86508	1	0	9.6	28.7	0	0		11.7	37.9	2.8	59.3	4.4	0.3	6.9	3.74	76.8	25.6	33.3	16.7	86	40	58	2	0	1	8.7	0.075	17.5	13	1.3	1.22328	0.611639	1	NGO	0
19	GG	CC	3	3	GC	GC	2	2	2	1	1	0	0	947	0	0	11.3	36.3	0	0	4.3	6.3	50.3	8.3	41.4	3.2	0.5	2.6	6.05	59.9	18.7	31.3	16.7	548					0	7.6	0.418	16.7	8	0.8	0.952131	0.476066	0	NGO	0
169	GG	CC	3	3	GC	GC	2	2	2	1	1	0	0	213.6	3	1	4.3	13.2	1	1	8.4	24.3	34.6	8.9	56.5	8.4	2.2	13.7	1.8	73.4	23.7	32.3	25	519	41	57	2	0	0	8	0.417	17.9	17	1.7	0.735738	0.367869	1	Salmonella typhimurium	1
121	GG	CC	3	3	GC	GC	2	2	2	1	1	0	0	46564.8	16	0	5.5	17	0	1	6.3	14.5	48.4	7.4	44.2	7	1.1	6.4	2.87	59.3	19.3	32.5	23.5	128	50	49	1	0	1	9.6	0.123	17.6	15	1.5	0.836066	0.418033	1	NGO	0
368	GG	CC	3	3	GC	GC	2	2	2	1	0	0	0	73318.2	0	0	2.8	8.4	1	1	5.1	16.3	51.8	5.4	42.8	8.4	0.9	7	1.05	79.8	26.4	33.1	21	249	56	44	0	0	0	7.4	0.185	18.2	99	9.9	2.72656	1.36328	1	NGO	0
203	GG	CC	3	3	GC	GC	2	2	2	1	0	0	0	558	0	0	11.6	34.8	0	0	5.61	6.2	34.4	5.5	60.1	2.1	0.3	3.7	5.15	67.7	22.5	33.2	20.3	836	39	61	0	0	0	6.9	0.58	16.6	53	5.3	6.04721	3.02361	0	Staphylococcus aureus	1
4	GG	CC	3	3	GC	GC	2	2	2	1	1	0	0	48353.7	0	0	12.4	36.2	0	0	6.2	11.9	32.1	5.2	62.7	3.8	0.6	7.5	5.24	69.2	23.7	34.3	16.5	242	38	62	0	0	0	6.9	0.168	16	8	0.8	0.949508	0.474754	0	NGO	0
283	GG	CC	3	3	GC	GC	2	2	2	1	0	0	0	427.2	0	0	7.1	21.8	0	0	6.1	10.5	47.1	5.3	47.6	4.9	0.6	5	3.34	65.4	21.2	32.5	24.7	216	56	36	8	0	0	9.2	0.2	18.3	69	6.9	4.9318	2.4659	0	Salmonella typhimurium	1
86	GT	CC	2	3	GC	TC	2	1	2	1	1	0	0	236	0	0	7	21.3	0	0		5.4	51.6	14.3	34.1	2.8	0.8	1.8	3.33	64.1	21.1	33	27.6	530	58	35	7	0	0	8.9	0.474	20.4	29	2.9	2.02525	1.01262	1	NGO	0
289	GT	CT	2	2	GC	TT	1	2	2	1	0	0	0	4992.9	8	0	6.3	22.3	0	0	3.9	9.1	67.3	9.5	23.2	6.1	0.9	2.1	2.36	94.6	26.7	28.3	24.7	147					1	7.5	0.111	16	105	10.5	7.67705	3.83852	0	NGO	0
149	GG	CC	3	3	GC	GC	2	2	2	1	1	0	0	35430.9	0	0	4.8	15.2	1	1		8.5	56.3	8.4	35.3	4.8	0.7	3	2.29	66.5	21.1	31.7	26.8	146	67	32	1	0	1	8.4	0.123	17.7	98	9.8	4.88393	2.44197	1	NGO	0
354	GG	CC	3	3	GC	GC	2	2	2	1	0	0	0	80.1	5	0	3.9	12.4	1	1	4.2	24.1	46.7	15.3	38	11.3	3.7	9.2	1.81	68.4	21.7	31.7	21.7	280	41	39	20	0	0	8	0.226	15.7	41	4.1	1.66689	0.833443	1	NGO	0
254	GG	CC	3	3	GC	GC	2	2	2	1	0	0	0	12095.1	0	0	8.8	27.4	0	0	4.94	11.2	47.3	6.6	46.1	5.3	0.7	5.2	4.85	56.5	18.1	32	20.2	184	52	48	0	0	0	11.3	0.207	18.5	14	1.4	1.2577	0.628852	1	NGO	0
1	GG	CC	3	3	GC	GC	2	2	2	1	1	0	0	195711	0	0	13	37.7	0	0	5.3	17.5	34.8	6	59.2	6.1	1	10.4	4.98	75.6	26	34.4	13.1	339	40	60	0	0	0	6.8	0.232	18.5	26	2.6	3.21377	1.60689	0	NGO	0
159	GG	CC	3	3	GC	GC	2	2	2	1	1	0	0	29743.8	0	0	4.6	14.5	1	1		15	58.5	11	30.5	8.8	1.6	4.6	2.2	65.7	21	32	22.8	170	65	31	4	0	0	7.9	0.135	18.2	59	5.9	2.80492	1.40246	1	NGO	0
296	GG	TT	3	1	GT	GT	2	2	1	2	0	0	0	42052.5	2	0	5.9	19.4	0	1	5.61	6.8	48.2	13.2	38.6	3.3	0.9	2.6	2.76	69.4	21.3	30.7	21.2	94	57	38	3	2	1	7.9	0.074	18	52	5.2	3.30754	1.65377	1	Staphylococcus epidermidis	1
332	GG	CC	3	3	GC	GC	2	2	2	1	0	0	0	5259.9	4	0	5.1	15.9	0	1	4.9	16.1	43.9	5.7	50.4	7.1	0.9	8.1	2.19	72.6	23.4	32.3	22.9	231	49	51	0	0	0	7.8	0.182	18.7	87	8.7	4.53541	2.2677	1	NGO	0
349	GG	CC	3	3	GC	GC	2	2	2	1	0	0	0	827.7	6	0	4.3	14.8	1	1	5.16	12.1	50.4	21	28.6	6.1	2.5	3.5	2	73.9	21.6	29.2	31.2	176	48	39	11	2	0	7	0.124	19.1	104	10.4	5.04656	2.52328	0	NGO	0
173	TT	CT	1	2	TC	TT	1	1	2	2	1	0	0	373.8	0	0	4.1	11.7	1	1	4.83	11.9	48.5	15.4	36.1	5.8	1.8	4.3	1.42	82.8	29.1	35.2	18.1	122	54	38	6	2	1	8.8	0.108	17.3	23	2.3	0.882295	0.441148	1	NGO	0
356	GG	CC	3	3	GC	GC	2	2	2	1	0	0	0	6781.8	15	0	3.8	12.8	1	1	4.38	21.8	46.5	13.1	40.4	10.1	2.9	8.8	1.68	76.2	22.6	29.7	24	147	50	46	4	0	1	9.4	0.139	18.7	33	3.3	1.38492	0.692459	1	NGO	0
297	GT	CT	2	2	GC	TT	1	2	2	1	0	0	0	37006.7	6	0	5.9	19.2	0	1		6.2	55	10	35	3.4	0.6	2.2	3.26	58.7	18	30.6	23.1	98	66	31	3	0	1	12.5	0.122	17	29	2.9	1.82557	0.912787	1	NGO	0
301	GG	CC	3	3	GC	GC	2	2	2	1	0	0	0	2029.2	8	0	5.9	17.7	0	1	6.1	16.4	62.9	13.5	23.6	10.3	2.2	3.9	2.75	64.5	21.5	33.4	22.1	68	67	28	5	0	1	9.4	0.064	19.9	75	7.5	4.35246	2.17623	0	Salmonella typhimurium	1
178	GG	CC	3	3	GC	GC	2	2	2	1	1	0	0	3444.3	12	0	3.8	12.8	1	1	5.1	20	51.6	11.4	37	10.3	2.3	7.4	1.53	83.7	24.8	29.6	22.4	209	47	44	9	0	0	8.1	0.17	16.5	68	6.8	2.85377	1.42689	1	Staphylococcus aureus	1
334	GG	CC	3	3	GC	GC	2	2	2	1	0	0	0	200197	4	1	5	15.6	0	1	7.75	12.6	43.8	7.9	48.3	5.5	1	6.1	2.41	65	20.9	32.1	23.5	88	50	50	0	0	1	9.1	0.081	17.5	10	1	0.511475	0.255738	1	Pseudomonas aeroginosa	1
26	GG	CC	3	3	GC	GC	2	2	2	1	1	0	0	64347	0	0	11.1	33.3	0	0	4.94	17.7	31.3	3.9	64.8	5.5	0.7	11.5	5.14	64.7	21.6	33.4	23.2	308	36	61	3	0	0	7.7	0.239	18.5	9	0.9	0.982623	0.491311	0	NGO	0
75	GG	CC	3	3	GC	GC	2	2	2	1	1	0	0	3898.2	1	0	7.8	25.8	0	0	4.67	9.4	69.3	9.6	21.1	6.5	0.9	2	3.91	65.9	19.9	30.2	22.7	175	74	24	2	0	0	7.8	0.137	17.3	51	5.1	4.3141	2.15705	0	NGO	0
285	GG	CC	3	3	GC	GC	2	2	2	1	0	0	0	38421.3	0	0	6.9	20.8	0	0	6.3	20.7	53.9	7.5	38.6	11.2	1.6	8	2.82	73.9	24.4	33	23.5	123	58	40	2	0	1	8.4	0.104	18	77	7.7	5.25115	2.62557	0	NGO	0
128	GG	CC	3	3	GC	GC	2	2	2	1	1	0	0	76629	8	0	5.3	17.2	0	1	3.7	14	51.2	8.8	40	7.2	1.2	5.6	2.22	77.2	24	31.1	21.9	135	49	47	4	0	1	9.3	0.126	17.5	85	8.5	4.79344	2.39672	0	NGO	0
167	GG	CC	3	3	GC	GC	2	2	2	1	1	0	0	2456.4	1	0	4.5	14	1	1	4.83	21.1	52.4	8.4	39.2	11.1	1.8	8.3	2.18	64.3	20.7	32.2	20.4	223	50	50	0	0	0	7	0.157	18.2	23	2.3	1.05574	0.527869	1	Staphylococcus aureus	1
231	GT	CT	2	2	GC	TT	1	2	2	1	0	0	0	22614.9	3	0	10.5	29.8	0	0		14.3	54	6.4	39.6	7.7	0.9	5.7	4.69	63.4	22.4	35.2	18.5	308	66	31	3	0	0	6.9	0.214	16.6	24	2.4	2.34492	1.17246	1	Staphylococcus (coagulase neg)	1
137	GG	CC	3	3	GC	GC	2	2	2	1	1	0	0	4859.4	0	0	5.2	16.9	0	1	3.9	14.2	67.8	9.7	22.5	9.6	1.4	3.2	3.08	54.8	16.9	30.8	26.1	156	70	23	7	0	0	12	0.186	17.4	112	11.2	6.2059	3.10295	0	NGO	0
362	GG	CC	3	3	GC	GC	2	2	2	1	0	0	0	694.2	5	0	3.6	10.7	1	1	5	19	53.6	13.4	33	10.2	2.5	6.3	1.7	62.9	21	33.4	19.1	111	59	36	5	0	1	9	0.1	17.5	57	5.7	1.99967	0.999836	1	NGO	0
126	GG	CC	3	3	GC	GC	2	2	2	1	1	0	0	32493.9	0	0	5.4	17.1	0	1		9.9	40.5	12	47.5	4	1.2	4.7	2.44	70.1	22.2	31.7	24.5	175	45	48	7	0	0	10.8	0.188	18.7	32	3.2	1.7941	0.897049	1	Salmonella typhimurium	1
148	GG	CC	3	3	GC	GC	2	2	2	1	1	0	0	50089.2	7	1	4.8	16.6	1	1	5.1	20.1	53.8	7.5	38.7	10.8	1.5	7.8	2.27	73.2	21.1	28.8	21.7	78	51	44	5	0	1	9.6	0.075	18.2	33	3.3	1.79607	0.898033	1	NGO	0
347	GG	CC	3	3	GC	GC	2	2	2	1	0	0	0	15272.4	10	0	4.6	14.1	1	1	4.22	11.3	67.8	10.8	21.4	7.7	1.2	2.4	2	70.3	23.2	33	23.2	46	76	20	4	0	1	8.3	0.038	17.1	100	10	4.62295	2.31148	1	NGO	0
56	GG	TT	3	1	GT	GT	2	2	1	2	1	0	0	6728.4	0	0	8.9	26.8	0	0	5.38	20.5	51.5	7.4	41.1	10.6	1.5	8.4	4.14	64.7	21.6	33.3	16.5	131	58	38	4	0	1	10.7	0.14	19.4	10	1	0.878689	0.439344	1	NGO	0
23	GG	CC	3	3	GC	GC	2	2	2	1	1	0	0	5996	0	0	11.2	34	0	0		13	65.1	8.5	26.4	8.5	1.1	3.4	4.47	76	25.1	33.1	16.4	507	70	27	3	0	0	6.4	0.326	17.4	45	4.5	5.01639	2.5082	0	NGO	0
163	GG	CC	3	3	GC	GC	2	2	2	1	1	0	0	169919	1	1	4.5	14.7	1	1	9.1	4.5	36.7	4.8	58.5	1.7	0.2	2.6	1.72	85.7	26.4	30.8	23.2	160	41	58	0	1	0	8.6	0.138	17.8	8	0.8	0.385574	0.192787	1	Staphylococcus aureus	1
11	GG	CC	3	3	GC	GC	2	2	2	1	1	0	0	49662	0	0	11.9	36.9	0	0	5.01	9	48.2	6.8	45	4.3	0.6	4.1	4.91	75.2	24.3	32.3	13.5	247	59	41	0	0	0	7.3	0.181	16.9	21	2.1	2.54066	1.27033	0	NGO	0
143	GT	CT	2	2	GC	TT	1	2	2	1	1	0	0	17622	10	0	5	14.1	0	1	4.6	19.6	40.2	10	49.8	7.9	2	9.8	1.88	74.9	26.5	35.4	18.2	214	45	51	4	0	0	8	0.172	18.8	39	3.9	1.80295	0.901475	1	NGO	0
235	GG	CC	3	3	GC	GC	2	2	2	1	0	2	0	567	0	0	10	32.5	0	0	5.05	18.4	58.7	8.2	33.1	10.8	1.5	6.1	5.43	59.8	18.5	30.9	21.9	364	68	30	2	0	0	7.7	0.282	18	18	1.8	1.91803	0.959016	1	Staphylococcus aureus	1
350	GG	CC	3	3	GC	GC	2	2	2	1	0	2	0	98122.5	8	2	4.1	12.1	1	1	7	13.5	24.5	3.8	71.7	3.3	0.5	9.7	1.91	63.2	21.4	33.9	27.7	223	30	70	0	0	0	10.8	0.24	19.1	59	5.9	2.34066	1.17033	1	Salmonella typhimurium	1
44	GG	CC	3	3	GC	GC	2	2	2	1	1	2	0	25365	0	0	9.9	31.3	0	0	5.44	11.3	45.2	9	45.8	5.1	1	5.2	4.46	70.3	22.3	31.7	21.2	199	50	43	7	0	0	7.7	0.154	16.7	26	2.6	2.6682	1.3341	1	Staphylococcus aureus	1
91	GG	CC	3	3	GC	GC	2	2	2	1	1	2	0	489	0	0	6.5	18.9	0	0		8.5	56.1	4.7	39.2	4.8	0.4	3.3	3.35	56.4	19.3	34.2	25	282	69	30	1	0	0	8.6	0.244	18.5	29	2.9	1.79705	0.898525	1	NGO	0
241	GG	CC	3	3	GC	GC	2	2	2	1	0	2	0	234	0	0	9.5	32.5	0	0	4.38	11	53.2	7.2	39.6	5.9	0.8	4.4	5.58	58.3	17.1	29.3	19.5	652	66	33	0	1	0	8	0.524	16.6	8	0.8	0.852459	0.42623	1	Staphylococcus aureus	1
252	GG	CC	3	3	GC	GC	2	2	2	1	0	2	0	534	0	0	8.9	27.2	0	0	4.16	10.9	78.8	7.9	13.3	8.6	0.9	1.4	3.57	76	24.8	32.7	21.6	165	88	11	1	0	0	6.8	0.112	16.2	53	5.3	4.72656	2.36328	0	Staphylococcus aureus	1
341	GG	CC	3	3	GC	GC	2	2	2	1	0	2	0	33588.6	6	0	4.8	17	1	1	5.8	10.1	51.7	18.8	29.5	5.2	1.9	3	2.61	65	18.2	28	24.9	178	49	39	12	0	0	9.6	0.171	18.3	70	7	3.90164	1.95082	1	NGO	0
286	GG	CC	3	3	GC	GC	2	2	2	1	0	2	0	1495.2	0	0	6.6	19.1	0	0		7.9	67.2	10.4	22.4	5.3	0.8	1.8	2.69	71	24.4	34.4	19.1	82	70	25	5	0	1	7.6	0.063	18.6	25	2.5	1.56557	0.782787	1	NGO	0
319	GT	CT	2	2	GC	TT	1	2	2	1	0	2	0	34443	3	0	5.4	18.8	0	1		15.9	42.6	16.5	40.9	6.8	2.6	6.5	2.79	67.5	19.3	28.6	23.4	217	58	41	1	0	0	7.8	0.17	17.7	87	8.7	5.36262	2.68131	0	Staphylococcus sp.	1
133	GG	CC	3	3	GC	GC	2	2	2	1	1	2	0	79752.9	7	1	5.2	15.1	0	1	4.4	18.2	60.5	9.7	29.8	11	1.8	5.4	2.84	53	18.3	34.4	22.3	255					0	11.7	0.297	18.1				0		NGO	0
313	GT	CT	2	2	GC	TT	1	2	2	1	0	2	0	7956.6	0	0	5.6	16.9	0	1		10.6	46.5	9.3	44.2	4.9	1	4.7	3.07	55.1	18.1	32.9	27.9	111	56	44	0	0	1	11.8	0.131	18.4	48	4.8	2.65967	1.32984	1	Staphylococcus epidermidis	1
38	GG	CC	3	3	GC	GC	2	2	2	1	1	2	0	75400	0	1	10.4	32	0	0	6.6	14.5	46	8.4	45.6	6.7	1.2	6.6	4.56	70.2	22.7	32.4	16.3	101					1	7.5	0.076	18	7	0.7	0.734426	0.367213	1	Gram positive rods	0
228	GG	CC	3	3	GC	GC	2	2	2	1	0	2	0	11908.2	0	0	10.7	34.7	0	0	4.61	8.7	54.5	4	41.5	4.7	0.3	3.6	4.84	71.7	22.1	30.8	15.7	199	62	38	0	0	0	7.6	0.152	16.5	5	0.5	0.568852	0.284426	1	NGO	0
240	GG	CC	3	3	GC	GC	2	2	2	1	0	2	0	10092.6	0	0	9.5	28.6	0	0	5.77	16.1	35.4	3.3	61.3	5.7	0.5	9.9	4.28	66.9	22.2	33.2	18.1	92	38	62	0	0	1	10.6	0.098	17.2	20	2	1.87541	0.937705	1	NGO	0
103	GG	CC	3	3	GC	GC	2	2	2	1	1	2	0	3310.8	25	0	5.9	18.5	0	1	4.72	28.4	49.5	13.3	37.2	14.1	3.8	10.6	2.81	65.9	20.9	31.7	22.7	84	57	43	0	0	1	12.1	0.101	14.7	112.9	11.29	6.84803	3.42402	0	NGO	0
358	GG	CC	3	3	GC	GC	2	2	2	1	0	2	0	14818.5	0	0	3.7	11.8	1	1	3.9	23.3	48.3	16.2	35.5	11.3	3.8	8.3	1.58	74.8	23.7	31.7	25.2	174	51	43	6	0	0	9.1	0.159	18	116	11.6	4.48787	2.24393	1	NGO	0
179	GG	CC	3	3	GC	GC	2	2	2	1	1	2	0	110431	26	5	3.6	10.1	1	1	5	23.1	39.2	8.2	52.6	9.1	1.9	12.2	1.5	66.9	23.7	35.4	21.2	223	58	32	10	0	0	8.1	0.182	17.5	14	1.4	0.463607	0.231803	1	NGO	0
47	GT	CT	2	2	GC	TT	1	2	2	1	1	2	0	10735	0	0	9.6	31.4	0	0	7.4	11.3	51.6	13.1	35.3	5.8	1.5	4	4.06	77.4	23.7	30.6	16.9	90					1	7.4	0.067	18.1	7	0.7	0.720656	0.360328	1	NGO	0
305	GG	CC	3	3	GC	GC	2	2	2	1	0	2	0	40103.4	0	0	5.8	18.6	0	1	5.55	10	40.6	7.5	51.9	4.1	0.8	5.2	3.42	54.3	16.9	31	22.4	98	55	45	0	0	1	9.7	0.096	16	33	3.3	2.01246	1.00623	1	NGO	0
9	GG	CC	3	3	GC	GC	2	2	2	1	1	2	0	13723.8	0	0	12	37.3	0	0	4.27	13.1	45.6	5.7	48.7	6	0.7	6.4	6	62.2	20	32.1	16.5	326	43	55	1	1	0	7.7	0.253	18.8	8	0.8	0.978361	0.48918	0	Gram positive rods	0
292	GG	CC	3	3	GC	GC	2	2	2	1	0	2	0	48567.3	16	0	6.2	21.2	0	0	5.4	9.9	63.6	13.5	22.9	6.3	1.3	2.3	2.99	71	20.7	29.2	27.4	152	69	20	11	0	0	9.7	0.148	16	83	8.3	5.76918	2.88459	0	NGO	0
102	GG	CC	3	3	GC	GC	2	2	2	1	1	2	0	4405.5	3	0	5.9	21.2	0	1		18.4	62.2	7.9	29.9	11.4	1.5	5.5	3.25	65.4	18.3	28	27.8	193	68	31	1	0	0	8.6	0.167	18.1	96	9.6	6.67279	3.33639	0	NGO	0
2	TT	CC	1	3	TC	TC	2	1	2	2	1	2	0	9212	0	0	12.8	39.9	0	0	3.61	13.8	58.9	7.7	33.4	8.1	1.1	4.6	5.75	69.3	22.3	32.2	28.4	31	64	33	3	0	1	7.5	0.023	16.8	86	8.6	11.2505	5.62525	0	Acinetobacter sp.	1
200	GG	CC	3	3	GC	GC	2	2	2	1	0	2	0	113528	0	0	11.6	33.8	0	0		21.3	26.2	4.5	69.3	5.6	1	14.8	4.83	70.1	24	34.2	18.7	54	30	70	0	0	1	9.5	0.051	15.7	4	0.4	0.443279	0.221639	0	NGO	0
153	GG	CC	3	3	GC	GC	2	2	2	1	1	2	0	1708.8	22	0	4.8	15.3	1	1	6.7	10.6	72.3	8.9	18.8	7.7	0.9	2	2.29	67.1	20.9	31.2	19.2	123	75	21	4	0	1	8	0.098	19.5	3	0.3	0.150492	0.0752459	1	NGO	0
72	GG	CC	3	3	GC	GC	2	2	2	1	1	2	0	17808.9	2	0	8.2	24.5	0	0		6.6	53.7	5.7	40.6	3.5	0.4	2.7	3.95	62	20.8	33.5	22.2	141	59	41	0	0	1	10.2	0.143	18.6	9	0.9	0.722951	0.361475	1	NGO	0
57	GT	CC	2	3	GC	TC	2	1	2	1	1	2	0	79032	0	0	8.8	26.8	0	0		11.7	39.9	9.5	50.6	4.7	1.1	5.9	4.53	59.2	19.4	32.7	19.8	426	40	59	1	0	0	7.9	0.338	16.4	19	1.9	1.66951	0.834754	1	Staphylococcus aureus	1
138	TT	CT	1	2	TC	TT	1	1	2	2	1	2	0	122.6	0	0	5.2	17.1	0	1	5.3	6.9	38.9	9.7	51.4	2.7	0.7	3.5	2.95	57.8	17.8	30.7	24.4	287	44	53	3	0	0	11.5	0.329	19.6	4	0.4	0.224262	0.112131	1	Salmonella typhimurium	1
174	GT	CC	2	3	GC	TC	2	1	2	1	1	2	0	976	0	0	4.1	12.8	1	1	5.44	7	40.2	1.5	58.3	2.8	0.1	4.1	2	64	20.5	32	22.7	134	40	60	0	0	1	9.6	0.129	17.5	6	0.6	0.251803	0.125902	1	Salmonella typhimurium	1
328	GG	CC	3	3	GC	GC	2	2	2	1	0	2	0	17168.1	5	0	5.2	14.8	0	1		13.2	62.6	9.8	27.6	8.3	1.3	3.6	1.74	85.4	30.1	35.2	26.4	125	72	26	2	0	1	8.1	0.102	17.5	120	12	5.82295	2.91148	0	NGO	0
172	GG	CC	3	3	GC	GC	2	2	2	1	1	2	0	26.7	6	0	4.2	14.7	1	1	6.6	10.7	55.5	5.8	38.7	5.9	0.6	4.1	2.39	61.6	17.8	28.9	25.9	200	54	38	8	0	0	8.5	0.171	19.4	85	8.5	4.09672	2.04836	1	Salmonella typhimurium	1
242	GG	CC	3	3	GC	GC	2	2	2	1	0	2	0	133954	0	0	9.4	29	0	0	4.4	8.3	44	7.2	48.8	3.7	0.6	4.1	4.05	71.5	23.2	32.4	18.2	83	48	49	3	0	1	8.9	0.074	16.5	19	1.9	1.80656	0.903279	1	NGO	0
155	GG	CC	3	3	GC	GC	2	2	2	1	1	2	0	83037	11	5	4.7	14.7	1	1	10.4	14	42.7	1.6	55.7	6	0.2	7.8	2.28	64.5	20.7	32.1	16.5	123	44	56	0	0	1	8.3	0.103	16.8	4	0.4	0.192787	0.0963934	1	NGO	0
256	GG	CC	3	3	GC	GC	2	2	2	1	0	2	0	1244	0	0	8.8	27	0	0		16.1	66.3	5.1	28.6	10.7	0.8	4.6	3.95	68.4	22.3	32.6	20.8	50	70	29	1	0	1	11.8	0.059	17.5	15	1.5	1.32787	0.663934	1	NGO	0
357	GT	CC	2	3	GC	TC	2	1	2	1	0	2	0	118067	7	0	3.7	11.1	1	1	7.4	19.8	37.8	5.2	57	7.5	1	11.3	1.96	56.3	18.8	33.4	27.9	195	44	51	5	0	0	11.9	0.232	16.9	23	2.3	0.837049	0.418525	1	NGO	0
308	GG	CC	3	3	GC	GC	2	2	2	1	0	2	0	17355	1	0	5.7	18.2	0	1		11.3	45.3	18.8	35.9	5.1	2.1	4.1	2.42	75.2	23.4	31.1	29.3	247	57	41	2	0	0	6.7	0.166	17.9	159	15.9	9.48787	4.74393	0	Gram positive rods	0
291	GT	CC	2	3	GC	TC	2	1	2	1	0	2	0	9125	0	0	6.3	20.2	0	0	3.7	4.1	65.1	11.8	23.1	2.7	0.5	0.9	3.15	64.2	20.1	31.3	23.6	64	70	27	3	0	1	9.4	0.06	15.3	13	1.3	0.860984	0.430492	1	Salmonella typhimurium	1
263	GG	CC	3	3	GC	GC	2	2	2	1	0	2	0	1478.2	0	0	8.5	25.6	0	0		6.2	49.1	22.7	28.2	3	1.4	1.7	3.28	78	26	33.3	16.1	72	50	39	11	0	1	8.3	0.06	17.5	20	2	1.67869	0.839344	1	Salmonella typhimurium	1
67	GG	CC	3	3	GC	GC	2	2	2	1	1	2	0	40584	0	0	8.4	25.9	0	0		9.2	31.3	2.9	65.8	2.9	0.3	6.1	4.57	56.7	18.3	32.3	20.8	423	35	65	0	0	0	8.5	0.362	17.5	27	2.7	2.29279	1.14639	1	NGO	0
257	GG	CC	3	3	GC	GC	2	2	2	1	0	2	0	16393.8	0	0	8.7	28.1	0	0	5.55	17.7	32.4	1.6	66	5.7	0.3	11.7	4.29	65.5	20.2	30.8	18.4	211	35	64	1	0	0	7.7	0.164	18	5	0.5	0.460656	0.230328	1	Staphylococcus warneri	1
82	GG	CC	3	3	GC	GC	2	2	2	1	1	2	0	87576	0	0	7	21.9	0	0	4.31	18.1	36	3.2	60.8	6.5	0.6	11	3.51	62.3	19.9	31.8	24.5	275	51	48	1	0	0	8	0.221	19.4	20	2	1.43607	0.718033	1	Staphylococcus aureus	1
176	GG	CC	3	3	GC	GC	2	2	2	1	1	2	0	41385	11	0	4	12.4	1	1	2.77	12.3	55.1	13.6	31.3	6.8	1.7	3.8	1.65	75.3	24.5	32.5	31.1	113	62	34	4	0	1	9.4	0.107	18.4	68	6.8	2.76459	1.3823	1	Staphylococcus sp.	1
152	TT	CT	1	2	TC	TT	1	1	2	2	1	2	0	25498.5	1	0	4.8	14.3	1	1		13.1	40.7	19.2	40.1	5.3	2.5	5.3	1.67	85.3	28.5	33.5	24.5	127	48	45	7	0	1	6.8	0.087	18.6	156	15.6	7.3141	3.65705	0	NGO	0
245	GT	CC	2	3	GC	TC	2	1	2	1	0	2	0	26646.6	0	0	9.2	28.5	0	0		10.3	35.9	14	50.1	3.7	1.4	5.2	4.42	64.5	20.9	32.4	20.5	166	40	52	8	0	0	8.5	0.142	17.2	4	0.4	0.37377	0.186885	1	NGO	0
34	GG	CC	3	3	GC	GC	2	2	2	1	1	2	0	6589	0	0	10.9	33.6	0	0	4.3	8.6	47.4	7.9	44.7	4.1	0.7	3.8	4.83	69.6	22.7	32.6	15.9	278	52	46	2	0	0	7.7	0.215	16.3	19	1.9	2.09311	1.04656	1	Salmonella enteridis	1
222	GT	CC	2	3	GC	TC	2	1	2	1	0	2	0	27821.4	0	0	11	30.8	0	0		8.1	35.2	2.5	62.3	2.9	0.2	5	4.54	68	24.2	35.6	15.6	293	42	58	0	0	0	7.1	0.209	16.6	5	0.5	0.504918	0.252459	0	NGO	0
69	GG	CC	3	3	GC	GC	2	2	2	1	1	2	0	95586	0	1	8.3	25.3	0	0		14.5	40	9.4	50.6	5.8	1.4	7.3	3.86	65.6	21.5	32.7	20.7	105	46	52	2	0	1	9.8	0.104	18.2	12	1.2	0.99541	0.497705	1	NGO	0
170	GT	TT	2	1	GT	TT	1	2	1	2	1	2	0	36365.4	11	2	4.2	12.7	1	1		19.5	45.8	5.2	49	8.9	1	9.6	1.7	74.3	24.4	32.8	18.1	135	50	50	0	0	1	9	0.122	18.2	38	3.8	1.5823	0.791148	1	NGO	0
209	GG	CC	3	3	GC	GC	2	2	2	1	0	2	0	5496	1	0	11.4	35.2	0	0	5.1	10.1	64	8.3	27.7	6.5	0.8	2.8	4.82	73	23.6	32.4	20.2	641	63	33	4	0	0	9.3	0.599	18.6	9	0.9	1.03869	0.519344	0	NGO	0
33	GG	CC	3	3	GC	GC	2	2	2	1	1	2	0	7881			11	33	0	0	4.8	7.1	67.3	11.3	21.4	4.78	0.8	1.52	5.07	65	21.7	33.2	15.5	396					0	8.1	0	0	2	0.2	0.216393	0.108197	0	NGO	0
330	GG	CC	3	3	GC	GC	2	2	2	1	0	2	0	3871.5	0	0	5.2	18.1	0	1	4.67	9.8	69.6	10.9	19.5	6.8	1.1	1.9	3.03	59.6	17.3	28.9	23.4	193	75	22	3	0	0	11.9	0.229	17	37	3.7	2.19574	1.09787	1	NGO	0
281	GG	CT	3	2	GC	GT	2	2	1	1	0	2	0	83864.7	5	0	7.4	22.5	0	0	4.5	10.6	54.5	17.7	27.8	5.8	1.9	2.9	3.26	69.2	22.6	32.7	19.3	164	62	24	14	0	0	9.1	0.15	17.2	52	5.2	3.83607	1.91803	1	NGO	0
322	GT	CT	2	2	GC	TT	1	2	2	1	0	2	0	16287	0	0	5.4	18.2	0	1		8.8	45.5	17	37.5	4	1.5	3.3	2.99	60.6	18.1	29.8	20.1	210	60	34	6	0	0	7.5	0.158	17.9	76	7.6	4.53508	2.26754	0	Staphylococcus aureus	1
290	GG	CC	3	3	GC	GC	2	2	2	1	0	2	0	3417.6	0	0	6.3	20.1	0	0	5.5	20.6	62.8	12.4	24.8	12.9	2.6	5.1	2.8	71.9	22.6	31.5	21.4	161	65	25	5	0	0	8.3	0.134	17.5	28	2.8	1.84525	0.922623	1	NGO	0
320	GG	CC	3	3	GC	GC	2	2	2	1	0	2	0	30491.4	10	2	5.4	18.4	0	1	4	10.3	56.8	9.9	33.3	5.9	1	3.4	2.59	71.2	21	29.5	24.8	164	58	39	3	0	0	9.3	0.154	18.1	54	5.4	3.2577	1.62885	1	NGO	0
59	GG	CC	3	3	GC	GC	2	2	2	1	1	2	0	1121.4	0	0	8.8	26.1	0	0		28.3	41.5	9	49.5	11.7	2.5	14	3.91	66.6	22.5	33.8	20.5	171	48	50	2	0	0	6.5	0.112	16.1	21	2.1	1.79705	0.898525	1	NGO	0
81	GG	CC	3	3	GC	GC	2	2	2	1	1	2	0	21760.5	0	0	7.1	22.1	0	0	4.7	14.7	46.3	5.6	48.1	6.8	0.8	7.1	3.48	63.3	20.3	32	21.5	69	44	49	6	1	1	11	0.076	18.1	11	1.1	0.797049	0.398525	1	Pseudomonas aeroginosa	1
208	GT	CC	2	3	GC	TC	2	1	2	1	0	2	0	24892	0	0	11.4	35.9	0	0	4.61	18.8	66	7.1	26.9	12.4	1.3	5.1	4.71	76.1	24.1	31.7	22.2	309	28	68	3	4	0	7.1	0.221	17	14	1.4	1.64787	0.823934	0	NGO	0
77	GG	CC	3	3	GC	GC	2	2	2	1	1	2	0	17328.3	15	0	7.3	22.5	0	0		10.9	40.4	15.4	44.2	4.4	1.7	4.8	3.35	67.2	21.7	32.3	22.4	139	48	45	7	0	1	8.2	0.115	17.6	11	1.1	0.811475	0.405738	1	NGO	0
298	GT	CC	2	3	GC	TC	2	1	2	1	0	2	0	21573.6	8	0	5.9	17.8	0	1	4.6	16.4	62.7	8.1	29.2	10.3	1.3	4.8	2.9	61.5	20.2	32.9	22.8	118	58	34	8	0	1	9.2	0.109	21.6	24	2.4	1.40066	0.700328	1	NGO	0
129	GT	CT	2	2	GC	TT	1	2	2	1	1	2	0	57298.2	3	0	5.3	18.7	0	1	4.6	6	49.2	8.1	42.7	3	0.5	2.6	2.23	83.8	23.9	28.5	21.6	92	51	48	1	0	1	7.8	0.072	17	51	5.1	3.12689	1.56344	1	NGO	0
123	GG	CC	3	3	GC	GC	2	2	2	1	1	2	0	2830.2	0	0	5.5	17.2	0	1	5.9	16.3	66.1	13.5	20.4	10.8	2.2	3.3	2.7	63.8	20.5	32.2	27.6	236	68	21	11	0	0	9.4	0.223	17.8	138	13.8	7.7823	3.89115	0	Staphylococcus aureus	1
251	GG	CC	3	3	GC	GC	2	2	2	1	0	2	0	14300	0	0	8.9	29.2	0	0	3.2	14.3	24.4	11	64.6	3.5	1.6	9.2	3.97	73.5	22.3	30.4	15.8	148					1	6.9	0.103	17	5	0.5	0.478689	0.239344	1	Staphylococcus (coagulase neg)	1
253	GG	CC	3	3	GC	GC	2	2	2	1	0	2	0	21360	0	0	8.8	28.6	0	0		9.9	50.7	10.7	38.6	5	1.1	3.8	5.24	54.5	16.8	30.9	23.6	148	64	34	2	0	1	7.2	0.107	16	8	0.8	0.750164	0.375082	1	NGO	0
369	GG	CC	3	3	GC	GC	2	2	2	1	0	2	0	5126.4	4	0	1.7	5.9	1	1	6.3	13.5	42.1	6.6	51.3	5.7	0.9	6.9	0.86	69.1	20.2	29.2	25.5	284	48	46	6	0	0	9	0.257	18.1	6	0.6	0.116066	0.0580328	1	Salmonella typhimurium	1
182	GT	CT	2	2	GC	TT	1	2	2	1	1	2	0	13350	3	0	3.4	11.2	1	1	4.6	8.6	49.5	14.6	35.9	4.3	1.3	3.1	1.29	86.8	26	30	25.8	182	51	46	3	0	0	7	0.128	17.7	109	10.9	4.00262	2.00131	1	NGO	0
275	GG	CC	3	3	GC	GC	2	2	2	1	0	2	0	28515.6	0	0	7.9	24.2	0	0		7.3	47.8	16	36.2	3.5	1.2	2.6	3.5	69.2	22.7	32.7	19.9	159	56	37	5	2	0	8	0.128	17.4	35	3.5	2.77705	1.38852	1	NGO	0
96	GT	CT	2	2	GC	TT	1	2	2	1	1	2	0	9158.1	0	0	6.2	20.6	0	0	4.88	3.5	49.1	9.5	41.4	1.7	0.3	1.4	3.34	61.7	18.5	30	19.1	61	58	39	3	0	1	9.6	0.059	19.7	14	1.4	0.945574	0.472787	1	Streptococcus Group D	1
154	GG	CC	3	3	GC	GC	2	2	2	1	1	2	0	347.1	5	0	4.8	13.5	1	1	6	13.9	41.6	14.6	43.8	5.8	2	6.1	2	67.3	24	35.6	18.7	137	43	54	3	0	1	7.7	0.106	17.2	34	3.4	1.50492	0.752459	1	NGO	0
303	GT	CT	2	2	GC	TT	1	2	2	1	0	2	0	1589.1	0	0	5.9	17.8	0	1		7.6	37.8	22.5	39.7	2.9	1.7	3	3.14	56.5	18.7	33.2	22.2	133	52	40	8	0	1	11.2	0.148	17.1	21	2.1	1.22557	0.612787	1	Salmonella typhimurium	1
93	GG	CC	3	3	GC	GC	2	2	2	1	1	2	0	8139	0	0	6.3	20.4	0	0	4.6	17.3	42.9	8.3	48.8	7.4	1.4	8.4	3.39	60.2	18.5	30.7	22	227	48	49	3	0	0	9.6	0.219	17.7	33	3.3	2.20721	1.10361	1	Salmonella typhimurium	1
216	GG	CC	3	3	GC	GC	2	2	2	1	0	2	0	58	0	0	11.2	33.2	0	0		13.2	44.9	8.1	47	5.9	1.1	6.2	4.8	69.2	23.3	33.7	14.1	267	50	48	2	0	0	7.2	0.193	17.6	5	0.5	0.544262	0.272131	0	NGO	0
116	GG	CC	3	3	GC	GC	2	2	2	1	1	2	0	202500			5.7	21.1	0	1	5.9	10.8	57.5	6.2	36.3	6.2	0.7	3.9	3.45	61.1	16.7	27.3	22	144					1	9.4	0.135	18.3	10	1	0.691803	0.345902	1	NGO	0
31	GT	CC	2	3	GC	TC	2	1	2	1	1	2	0	98923.5	0	0	11	31.9	0	0		9.1	33.7	2.7	63.6	3.1	0.2	5.8	4.13	77.3	26.6	34.4	25	220	36	64	0	0	0	9	0.199	17.4	71	7.1	7.4259	3.71295	0	NGO	0
299	GT	CC	2	3	GC	TC	2	1	2	1	0	2	0	13990.8	0	0	5.9	19.1	0	1	4.06	9.8	54.8	16.2	29	5.4	1.6	2.8	2.38	80	24.7	30.8	22.2	518	60	33	7	0	0	6.5	0.338	19.1	83	8.3	5.1977	2.59885	0	NGO	0
300	TT	CC	1	3	TC	TC	2	1	2	2	0	2	0	5687.1	19	6	5.9	17.7	0	1	5.56	5.1	36.7	13.2	50.1	1.9	0.7	2.6	3.01	58.8	19.6	33.3	24.2	108	42	51	5	2	1	10.8	0.117	20.3	9	0.9	0.522295	0.261148	1	NGO	0
205	GG	CC	3	3	GC	GC	2	2	2	1	0	2	0	109283	0	0	11.5	33.7	0	0		16	31.6	2.4	66	5.1	0.4	10.6	5.09	66.1	22.6	34.2	19.6	75	44	56	0	0	1	8.1	0.061	18.6	22	2.2	2.43082	1.21541	0	NGO	0
261	TT	CC	1	3	TC	TC	2	1	2	2	0	2	0	19971.6	0	0	8.5	28.1	0	0		10.4	46.4	5.5	48.1	4.8	0.6	5	4.45	63.1	19.1	30.3	18.8	285	49	50	1	0	0	9.4	0.269	17.6	60	6	5.52787	2.76393	0	NGO	0
120	GT	CC	2	3	GC	TC	2	1	2	1	1	2	0	24377.1	0	0	5.6	18	0	1		11.1	57.8	10.9	31.3	6.4	1.2	3.5	2.49	72.5	22.3	30.8	27.2	155	63	33	4	0	0	10.5	0.162	17.4	31	3.1	1.82951	0.914754	1	NGO	0
314	GG	CC	3	3	GC	GC	2	2	2	1	0	2	0	45	0	0	5.6	17.5	0	1	6	16.1	63	10.5	26.5	10.1	1.7	4.3	2.65	65.9	21.2	32.2	19.3	296	68	29	3	0	0	6.8	0.202	19.1	22	2.2	1.2623	0.631148	1	Salmonella typhimurium	1
293	GG	CC	3	3	GC	GC	2	2	2	1	0	2	0	29263.2	5	0	6.1	19.8	0	0	4.16	7.3	65.2	8.4	26.4	4.8	0.6	1.9	3.01	65.7	20.3	30.9	22	121	70	25	5	0	1	9.3	0.113	18.7	21	2.1	1.36328	0.681639	1	Staphylococcus aureus	1
339	GT	CT	2	2	GC	TT	1	2	2	1	0	2	0	4619.1	11	0	4.9	15.2	1	1	5.6	17.3	46.6	17.3	36.1	8.1	3	6.2	2.71	56.2	18	32	25.7	163	44	29	27	0	0	10.4	0.169	19	14	1.4	0.697705	0.348852	1	NGO	0
29	GT	CT	2	2	GC	TT	1	2	2	1	1	2	0	5289	0	0	11.1	35	0	0	4.6	11.4	48.8	6.8	44.4	5.6	0.8	5.1	6.12	57.1	18.2	31.9	21	494	51	49	0	0	0	7.9	0.392	17.9	23	2.3	2.63934	1.31967	0	NGO	0
80	GG	CC	3	3	GC	GC	2	2	2	1	1	2	0	192280			7.1	22.5	0	0	3.9	22.8	15	4.3	80.7	3.4	1	18.4	3.21	70.2	22.2	31.7	17.8	100					1	9.7	0.097	17	6	0.6	0.442623	0.221311	1	NGO	0
274	GG	CC	3	3	GC	GC	2	2	2	1	0	2	0	2643.3	0	0	8	26.9	0	0	5.77	8.5	50.2	7.3	42.5	4.3	0.6	3.6	5.19	51.4	15.4	29.8	21.9	430	56	40	3	1	0	10.9	0.467	18.4	17	1.7	1.49934	0.749672	1	NGO	0
130	GG	CC	3	3	GC	GC	2	2	2	1	1	2	0	10893.6	3	0	5.3	16.5	0	1	4.88	12.9	59.2	8.5	32.3	7.6	1.1	4.2	2.82	58.6	18.7	31.8	19.6	137	65	28	7	0	1	7.8	0.108	19.3	21	2.1	1.13607	0.568033	1	NGO	0
304	GG	CC	3	3	GC	GC	2	2	2	1	0	2	0	159355	1.33	1.33	5.8	20.4	0	1	8.2	20.3	35.3	8	56.7	7.2	1.6	11.5	3.61	56.3	16.1	28.5	23.9	172					0	9.1	0.156	19.1	20	2	1.3377	0.668852	1	NGO	0
323	GT	CC	2	3	GC	TC	2	1	2	1	0	2	0	5900.7	10	0	5.4	19.4	0	1	4.9	22.8	34.1	6.1	59.8	7.8	1.4	13.6	2.07	93.8	26.2	27.9	22.2	481	41	52	3	1	0	6	0.29	18.9	96	9.6	6.10623	3.05311	0	Acinetobacter sp.	1
351	GT	TT	2	1	GT	TT	1	2	1	2	0	2	0	13483.5	0	0	4.1	15.3	1	1	6.6	17.5	25.4	9.6	65	4.4	1.7	11.4	1.89	80.7	21.7	26.9	26.2	186	32	59	9	0	0	8.1	0.151	17.4	23	2.3	1.15377	0.576885	1	Salmonella arizonae	1
345	GG	CC	3	3	GC	GC	2	2	2	1	0	2	0	219608	3	0	4.7	13.1	1	1	7.9	8.6	32.8	4.2	63	2.8	0.4	5.4	1.89	69.5	24.9	35.8	21.8	76	44	53	3	0	1	9.3	0.071	17	12	1.2	0.51541	0.257705	1	NGO	0
122	GT	CC	2	3	GC	TC	2	1	2	1	1	2	0	34416.3	0	0	5.5	17.5	0	1		10	60	5.6	34.4	6	0.6	3.4	2.6	67.3	21	31.1	29	159	68	32	0	0	0	8.6	0.137	17.1	179	17.9	10.2705	5.13525	0	Staphylococcus (coagulase neg)	1
295	GG	CT	3	2	GC	GT	2	2	1	1	0	2	0	7502.7	0	0	6	20.3	0	0	5.3	6.3	45.1	12.5	42.4	2.8	0.8	2.7	2.89	70.3	20.8	29.7	24.9	158	47	49	4	0	0	7.7	0.122	18.7	97	9.7	6.45607	3.22803	0	Salmonella typhi	1
326	GG	CC	3	3	GC	GC	2	2	2	1	0	2	0	30144.3	7	2	5.3	16.1	0	1		15.3	34.3	6.9	58.8	5.2	1.1	9	2.05	78.2	25.9	33.1	21.9	182	32	56	12	0	0	9	0.164	17.2	81	8.1	4.27574	2.13787	0	NGO	0
247	GT	CT	2	2	GC	TT	1	2	2	1	0	2	0	95566.7	0	0	9	30.6	0	0	5.7	9.4	47.2	10.1	42.7	4.4	0.9	4	4.02	76.3	22.4	29.3	20.5	124					1	7.5	0.093	17.5	14	1.4	1.40459	0.702295	1	Enterobacter cloacae	1
70	GG	CC	3	3	GC	GC	2	2	2	1	1	2	0	22668.3	0	0	8.2	25.4	0	0		15.9	56	15.3	28.7	8.9	2.4	4.6	3.56	71.2	22.9	32.2	20.4	159	60	35	5	0	0	7.7	0.123	16.7	56	5.6	4.66361	2.3318	0	NGO	0
280	GG	CC	3	3	GC	GC	2	2	2	1	0	2	0	4031.7	0	0	7.5	23.8	0	0	4.28	8.3	72.8	9.8	17.4	6	0.8	1.4	3.51	67.8	21.5	31.6	23.9	189	78	20	2	0	0	8.6	0.164	17.9	87	8.7	6.78885	3.39443	0	NGO	0
118	GG	CC	3	3	GC	GC	2	2	2	1	1	2	0	35858.1	4	0	5.7	18.4	0	1	4.9	6.2	62.9	7.6	29.5	3.9	0.5	1.8	3.38	54.3	16.8	30.9	21.7	79	59	32	9	0	1	7.2	0.057	16.4	45	4.5	2.71475	1.35738	1	NGO	0
99	GT	CC	2	3	GC	TC	2	1	2	1	1	4	0	1121.4	2	0	6.1	19.9	0	0	5.9	24.5	57.3	2.2	40.5	14	0.5	9.9	3.66	54.3	16.7	30.7	22.3	233	62	38	0	0	0	10.3	0.239	17.6	46	4.6	3.00131	1.50066	1	Salmonella typhimurium	1
64	GG	CC	3	3	GC	GC	2	2	2	1	1	4	0	9288	0	0	8.6	28.5	0	0	3.8	10.8	29.4	9	61.6	3.2	1	6.7	4.63	61.6	18.5	30.1	22.1	206					0	7.6	0.156	16.9	8	0.8	0.747541	0.37377	1	NGO	0
134	GG	CC	3	3	GC	GC	2	2	2	1	1	4	0	79752.9	7	1	5.2	15.1	0	1	4.4	18.2	60.5	9.7	29.8	11	1.8	5.4	2.84	53	18.3	34.4	22.3	255	-1	-1	-1	-1	0	11.7	0.297	18.1				0		NGO	0
192	GG	CC	3	3	GC	GC	2	2	2	1	0	4	0	325			13.2	41.1	0	0	3.2	11.9	64.7	3.2	32.1	7.7	0.4	3.8	5.48	74.9	24.1	32.1	13.8	494					0	6.4	0.315	15.7	15	1.5	2.02131	1.01066	0	NGO	0
30	GG	CC	3	3	GC	GC	2	2	2	1	1	4	0	152510	0	1	11	33.7	0	0	3.83	15.7	24.9	7.6	67.5	3.9	1.2	10.6	4.16	81	26.4	32.6	18.5	117	21	74	5	0	1	7.4	0.084	17.6	24	2.4	2.6518	1.3259	0	NGO	0
225	GT	CC	2	3	GC	TC	2	1	2	1	0	4	0	1003	0	0	11	35.9	0	0	5.8	14.1	55.7	7.1	37.2	7.9	1	5.2	5.29	67.8	20.7	30.6	25.1	177					0	6.7	0.118	17.9	7	0.7	0.823934	0.411967	0	NGO	0
184	GG	CC	3	3	GC	GC	2	2	2	1	1	4	0	186.9	4	0	3.4	12.3	1	1	4.9	8.2	41.7	9.2	49.1	3.4	0.8	4	1.58	77.4	21.7	28	20.8	159	40	52	8	0	0	6.9	0.11	18.8	59	5.9	2.37934	1.18967	1	Salmonella typhimurium	1
147	GT	CT	2	2	GC	TT	1	2	2	1	1	4	0	1408			4.9	17.9	1	1	6.9	12.8	64	12	24	8.2	1.5	3.1	2.88	62	17.1	27.7	28.8	169					0	9.1	0.153	18.4	30	3	1.76066	0.880328	1	Salmonella Gp B	1
74	GG	CC	3	3	GC	GC	2	2	2	1	1	4	0	41064.8	0	0	7.8	23.7	0	0		9.7	33.2	5.8	61	3.2	0.6	5.9	3.61	65.6	21.5	32.8	23.9	175	37	62	1	0	0	8.3	0.146	17.1	39	3.9	3.03049	1.51525	1	NGO	0
18	GT	CC	2	3	GC	TC	2	1	2	1	1	4	0	3258	0	0	11.3	36.2	0	0	4.33	11.2	59.9	7.9	32.2	6.7	0.9	3.6	4.95	73.1	22.9	31.4	16.4	194	65	31	4	0	0	7.7	0.151	16.9	11	1.1	1.30557	0.652787	0	NGO	0
264	GG	CC	3	3	GC	GC	2	2	2	1	0	4	0	34977	0	0	8.4	27	0	0		7.3	41.6	5.1	53.3	3	0.4	3.9	3.72	72.6	22.5	31	21.5	73	45	55	0	0	1	10.7	0.078	16.6	33	3.3	2.92131	1.46066	1	NGO	0
83	GT	CC	2	3	GC	TC	2	1	2	1	1	4	0	10840.2	3	0	7	22.4	0	0		14.8	56.9	5.8	37.3	8.4	0.9	5.5	2.96	75.6	23.7	31.3	23.4	137	65	35	0	0	1	9.2	0.126	17.7	49	4.9	3.59869	1.79934	1	NGO	0
266	GT	CT	2	2	GC	TT	1	2	2	1	0	4	0	42987	4	0	8.3	25.9	0	0		11.2	55.1	20.8	24.1	6.2	2.3	2.7	3.1	83.6	26.9	32.2	24	152	65	25	10	0	0	7.7	0.118	17.3	67	6.7	5.68951	2.84475	0	NGO	0
267	GG	CC	3	3	GC	GC	2	2	2	1	0	4	0	37406.7	0	0	8.3	24.5	0	0		12.3	33.3	4.3	62.4	4.1	0.5	7.7	3.87	63.3	21.4	33.7	32.2	177	43	57	0	0	0	9.2	0.164	18.2	5	0.5	0.401639	0.20082	1	NGO	0
160	GG	CC	3	3	GC	GC	2	2	2	1	1	4	0	3337.5	3	0	4.6	15.9	1	1	5.28	18.1	48.4	7.6	44	8.8	1.4	8	2.56	61.9	18	29.1	27.4	301	53	45	2	0	0	8.8	0.266	19.9	119	11.9	6.20361	3.1018	0	Salmonella enterica	1
238	GT	CC	2	3	GC	TC	2	1	2	1	0	4	0	574040	0.33	1	9.5	32.3	0	0	6.3	22.6	41	10.9	48.1	9.3	2.5	10.9	5.02	64.3	18.9	29.4	19.8	225					0	7	0.158	15.9	12	1.2	1.27082	0.63541	1	NGO	0
302	GG	CC	3	3	GC	GC	2	2	2	1	0	4	0	907.8	1	0	5.9	18.8	0	1		8.3	49.6	12.4	38	4.1	1	3.2	3.43	54.9	17.1	31.2	21.4	117	59	41	0	0	1	9.6	0.113	17.5	12	1.2	0.739672	0.369836	1	Salmonella enteritidis	1
271	GG	CC	3	3	GC	GC	2	2	2	1	0	4	0	72410.4	6	3	8.1	25.3	0	0		7.5	39.1	3.7	57.2	2.9	0.3	4.3	4.31	58.7	18.7	31.8	20.7	108	41	57	2	0	1		0.098	16.3	13	1.3	1.07836	0.53918	1	Staphylococcus aureus	1
206	GT	CC	2	3	GC	TC	2	1	2	1	0	4	0	1228.2	0	0	11.5	36.9	0	0		10.2	55.9	9.1	35	5.7	0.9	3.6	4.89	75.6	23.6	31.2	20.2	234	67	31	2	0	0	6.1	0.144	16.1	10	1	1.20984	0.604918	0	Staphylococcus sp.	1
156	GT	CT	2	2	GC	TT	1	2	2	1	1	4	0	22267.8	1	0	4.7	15.8	1	1	3.2	12.5	55.6	13.2	31.2	6.9	1.6	3.9	1.74	91.1	26.8	29.4	28.1	100	57	39	4	0	1	9.4	0.095	19.1	231	23.1	11.9666	5.98328	0	NGO	0
10	GG	CC	3	3	GC	GC	2	2	2	1	1	4	0	233	0	0	12	36	0	0	4.72	10.3	64.2	5.4	30.4	6.6	0.6	3.1	4.84	74.4	24.8	33.4	18.2	265	69	31	0	0	0	8	0.213	16.6	71	7.1	8.38033	4.19016	0	NGO	0
329	GG	CC	3	3	GC	GC	2	2	2	1	0	4	0	10626.6	7	0	5.2	17.4	0	1	3.56	17.4	55.3	16.4	28.3	9.6	2.9	4.9	2.52	68.9	20.6	30	25.8	199	60	32	6	2	0	8.3	0.166	18.3	73	7.3	4.16459	2.0823	0	Enterobacteriaceae spp.	1
21	GG	CC	3	3	GC	GC	2	2	2	1	1	4	0	55242.3	0	0	11.2	33.6	0	0	6.83	11.6	19.7	2.7	77.6	2.3	0.3	9	4.22	79.5	26.5	33.4	13.8	266	25	75	0	0	0	7.9	0.211	16.5	7	0.7	0.771148	0.385574	0	NGO	0
65	GG	CC	3	3	GC	GC	2	2	2	1	1	4	0	31000	0	0	8.5	28.9	0	0	6.4	15.5	34.1	3.5	62.4	5.3	0.5	9.7	4.35	66.4	19.4	29.3	20.5	153					0	9	0.137	17	7	0.7	0.663279	0.331639	1	NGO	0
306	GG	CC	3	3	GC	GC	2	2	2	1	0	4	0	56443.8	3	0	5.7	17.8	0	1	7.2	7.5	29	10.7	60.3	2.2	0.8	4.5	2.74	65	20.8	32	21.9	74	32	59	9	0	1	9.4	0.07	18.6	27	2.7	1.57574	0.787869	1	NGO	0
307	GG	CC	3	3	GC	GC	2	2	2	1	0	4	0	27287.4	5	1	5.7	17.1	0	1	5	13.9	40.8	8.6	50.6	5.7	1.2	7	2.64	64.7	21.7	33.5	21.7	166	41	59	0	0	0	8.8	0.147	18.1	12	1.2	0.672787	0.336393	1	Staphylococcus (coagulase neg)	1
317	GT	CT	2	2	GC	TT	1	2	2	1	0	4	0	560.7	0	0	5.5	19	0	1	5.7	23.2	72.4	9.9	17.7	16.8	2.3	4.1	2.34	81.1	23.4	28.8	33.3	123	77	20	3	0	1	8.6	0.106	17.7	173	17.3	10.777	5.38852	0	NGO	0
287	TT	CT	1	2	TC	TT	1	1	2	2	0	4	0	25178.1	0	0	6.4	19.4	0	0	6.7	9.3	40.6	9.9	49.5	3.8	0.9	4.6	3.37	57.6	19.1	33.1	22.8	76	44	52	4	0	1	7.4	0.057	15.7	15	1.5	0.954098	0.477049	1	NGO	0
98	GG	CC	3	3	GC	GC	2	2	2	1	1	4	0	13323.3	0	0	6.1	19.3	0	0		15.8	35	6.2	58.8	5.5	1	9.3	3.42	56.6	17.8	31.4	23.8	87	39	55	6	0	1	11.4	0.099	18.2	22	2.2	1.39213	0.696066	1	Salmonella typhimurium	1
100	GG	CC	3	3	GC	GC	2	2	2	1	1	4	0	6327.9	0	0	6	18.7	0	0	3.83	24.7	40.7	9.1	50.2	10.1	2.2	12.4	2.94	63.8	20.3	31.9	18.3	132	46	50	3	1	1	9.3	0.124	17.9	10	1	0.613115	0.306557	1	NGO	0
269	GT	CC	2	3	GC	TC	2	1	2	1	0	4	0	3257.4	0	0	8.2	23.6	0	0		9.2	55.8	10.9	33.3	5.1	1	3.1	3.89	60.7	21.2	34.8	27.1	468	60	34	6	0	0	7.5	0.353	18.4	40	4	3.09508	1.54754	1	NGO	0
226	GT	CT	2	2	GC	TT	1	2	2	1	0	4	0	8544	0	0	10.8	34.6	0	0	5.72	11.9	32.3	3.2	64.5	3.8	0.4	7.7	5.38	64.4	20.2	31.3	19.8	198					0	9.2	0.183	18.4	17	1.7	1.92852	0.964262	1	Staphylococcus aureus	1
53	GG	CC	3	3	GC	GC	2	2	2	1	1	4	0	774.3	0	0	9.3	28	0	0		7.8	55	5.2	39.8	4.3	0.4	3.1	4.2	66.6	22.3	33.4	22.6	187	60	36	4	0	0	7.5	0.141	18.4	37	3.7	3.39672	1.69836	0	NGO	0
190	GG	CC	3	3	GC	GC	2	2	2	1	0	4	0	5523	0	0	13.7	41.5	0	0	5.2	9	58.3	3.8	37.9	5.2	0.3	3.4	5.67	73.2	24.2	33.1	22.4	401	62	38	0	0	0	7.4	0.298	17.6	2	0.2	0.272131	0.136066	0	NGO	0
146	GG	CC	3	3	GC	GC	2	2	2	1	1	4	0	7876.5	0	0	4.9	13.5	1	1	3.67	30.3	66.4	10.6	23	20.1	3.2	7	1.87	72	26.1	36.2	22.3	231	70	25	5	0	0	7.6	0.176	18.1	71	7.1	3.14262	1.57131	1	NGO	0
207	GG	CC	3	3	GC	GC	2	2	2	1	0	4	0	71128.8	1	0	11.4	36.9	0	0	1.77	10.3	27.6	8.5	63.9	2.8	0.9	6.6	4.5	81.9	25.3	30.9	18	153	32	66	2	0	0	7.1	0.109	17.5	14	1.4	1.69377	0.846885	0	NGO	0
361	GG	TT	3	1	GT	GT	2	2	1	2	0	4	0	14952	0	0	3.6	12.2	1	1		6.6	61.9	7.7	30.4	4.1	0.5	2	1.66	73.6	21.9	29.8	26.7	106	67	31	2	0	1	9.1	0.097	17.1	75	7.5	3	1.5	1	NGO	0
272	GG	CC	3	3	GC	GC	2	2	2	1	0	4	0	55322.4	0	0	8.1	24.8	0	0		9.3	30.8	1.6	67.6	2.9	0.1	6.3	3.98	62.3	20.4	32.8	21.5	204	31	66	3	0	0	8	0.164	17.3	25	2.5	2.03279	1.01639	1	NGO	0
211	GG	CC	3	3	GC	GC	2	2	2	1	0	4	0	29423.4	0	0	11.3	36.5	0	0		11.9	43.5	5.6	50.9	5.2	0.7	6.1	5.07	72	22.2	30.9	17.7	171	35	64	1	0	0	7.1	0.122	15.9	9	0.9	1.07705	0.538525	0	NGO	0
157	GT	CT	2	2	GC	TT	1	2	2	1	1	4	0	556	0	0	4.7	16.8	1	1	5.3	9.5	38.6	13.4	48	3.7	1.3	4.6	2.04	82.3	23	27.9	22.7	267	44	47	9	0	0	7.2	0.193	18	18	1.8	0.991475	0.495738	1	Encherichia coli	1
151	GT	CC	2	3	GC	TC	2	1	2	1	1	4	0	29076.3	17	0	4.8	14.1	1	1	4.3	9.8	56.9	16.4	26.7	5.6	1.6	2.6	2.21	63.8	21.9	34.3	21.7	274	72	15	13	0	0	7.5	0.207	17.5	104	10.4	4.80787	2.40393	1	NGO	0
78	GG	CC	3	3	GC	GC	2	2	2	1	1	4	0	3871.5	0	0	7.3	24	0	0		16.9	46.6	9	44.4	7.9	1.5	7.5	3.68	65.3	19.9	30.5	20.2	117	52	46	2	0	1	7.5	0.088	16.7	60	6	4.72131	2.36066	0	NGO	0
79	GG	CC	3	3	GC	GC	2	2	2	1	1	4	0	30224.4	0	0	7.2	23.1	0	0		13.1	35.7	5.7	58.6	4.7	0.7	7.7	3.89	59.2	18.6	31.4	20.9	204	40	69	1	0	0	7.3	0.15	16.9	3	0.3	0.227213	0.113607	1	NGO	0
279	GT	CC	2	3	GC	TC	2	1	2	1	0	4	0	32226.9	2	0	7.6	23.1	0	0	4.72	9.3	31.5	7	61.5	2.9	0.7	5.7	4.48	51.6	17	33	32.7	238	37	61	2	0	0	9.2	0.219	16.4	11	1.1	0.833115	0.416557	1	NGO	0
22	GG	CC	3	3	GC	GC	2	2	2	1	1	4	0	4760	0	0	11.2	36.5	0	0	7.3	13.6	39.3	6.4	54.3	5.3	0.9	7.4	5.88	62	19	30.7	20.9	408					0	6.7	0.272	17.3	9	0.9	1.07705	0.538525	0	NGO	0
229	GG	CC	3	3	GC	GC	2	2	2	1	0	4	0	7823.1	7	0	10.6	31.6	0	0		9	64.7	11.6	23.7	5.8	1	2.1	4.64	68.1	22.9	33.5	24.5	176	70	24	6	0	0	7.1	0.126	17.7	2	0.2	0.207213	0.103607	1	NGO	0
89	GG	CC	3	3	GC	GC	2	2	2	1	1	4	0	28889.4	1	0	6.7	20.7	0	0		10.3	28.9	2	69.1	3	0.2	7.1	3.76	55	17.8	32.4	24	73	38	62	0	0	1	9.7	0.071	15.4	13	1.3	0.882295	0.441148	1	Staphylococcus sp.	1
50	GT	CC	2	3	GC	TC	2	1	2	1	1	4	0	274500	0	0	9.4	30.7	0	0	5.3	9	38.9	11.4	49.7	3.5	1	4.5	4.33	70.8	21.6	30.6	22	205					0	7.1	0.146	18.9	4	0.4	0.402623	0.201311	1	NGO	0
236	GT	TT	2	1	GT	TT	1	2	1	2	0	4	0	50249.4	0	0	9.7	29.9	0	0		12.9	49.3	10.4	40.3	6.4	1.3	5.2	4.49	66.7	21.6	32.4	16.1	185	51	45	4	0	0	8.4	0.157	17.3	16	1.6	1.56852	0.784262	1	NGO	0
364	GG	CC	3	3	GC	GC	2	2	2	1	0	4	0	9879.3			3.4	10.5	1	1	1.3	51.1	22.9	7.7	69.4	11.7	3.9	35.5	1.52	68.7	22.4	32.6	22.8	184					0	7.4	0.136	17.3	8	0.8	0.27541	0.137705	1	NGO	0
84	GT	CT	2	2	GC	TT	1	2	2	1	1	4	0	2723.4	8	2	7	21.7	0	0		13.8	64.9	12.9	22.2	9	1.8	3.1	2.75	78.8	25.5	32.3	22.9	195	70	22	8	0	0	8.4	0.165	18.3	101	10.1	7.1859	3.59295	0	NGO	0
230	GT	CC	2	3	GC	TC	2	1	2	1	0	4	0	86561.4	0	0	10.5	32.1	0	0		9.7	61.7	10.5	27.8	6	1	2.7	4.74	67.6	22.2	32.9	19	142	65	31	4	0	1	8.3	0.118	16.9	19	1.9	1.99967	0.999836	1	NGO	0
219	GG	CC	3	3	GC	GC	2	2	2	1	0	4	0	48032			11.1	32.9	0	0	4.9	15.8	32.9	13.7	53.4	5.2	2.17	8.44	4.55	72	24.3	33.6	15.4	122					1	9.7	0	0	7	0.7	0.755082	0.377541	0	NGO	0
255	GG	CC	3	3	GC	GC	2	2	2	1	0	4	0	456	0	0	8.8	29.5	0	0	5.27	21.4	60.3	7.1	32.6	12.9	1.5	7	4.73	62.3	18.7	30	20	382	59	41	0	0	0	11.1	0.422	17.9	22	2.2	2.12787	1.06393	1	Staphylococcus aureus	1
363	GG	CC	3	3	GC	GC	2	2	2	1	0	4	0	3276	0	0	3.5	12.9	1	1	4.8	23.4	33.8	4.5	61.7	7.9	1.1	14.4	2.21	58.4	16	27.4	25.5	87					1	11.2	0.098	16.7	30	3	1.26885	0.634426	1	NGO	0
340	GT	CT	2	2	GC	TT	1	2	2	1	0	4	0	79566	0	0	4.8	16.4	1	1	8	8.3	31.4	1.1	67.5	2.6	0.1	5.6	2.78	59.1	17.3	29.4	25.8	66	30	70	0	0	1	9.1	0.061	15.4	41	4.1	2.20459	1.1023	1	NGO	0
136	GG	CC	3	3	GC	GC	2	2	2	1	1	4	0	8250.3	0	0	5.2	18.6	0	1	7.3	12.1	32.3	12.2	55.5	3.9	1.5	6.7	2.93	63.4	17.7	27.9	29.3	387	39	51	10	0	0	8.9	0.347	18.2	21	2.1	1.28066	0.640328	1	Staphylococcus aureus	1
212	GG	CC	3	3	GC	GC	2	2	2	1	0	4	0	996.7			11.3	36.6	0	0	5.3	11.5	36.4	3.3	60.3	4.2	0.4	6.9	5.21	70.2	21.8	31	17	394					0	6.9	0.274	16.1	8	0.8	0.96	0.48	0	NGO	0
227	GG	CC	3	3	GC	GC	2	2	2	1	0	4	0	197046	2	1	10.7	33.6	0	0	6.3	9.6	32.6	15.8	51.6	3.1	1.5	5	4.24	79.4	25.3	31.8	17	212	28	68	4	0	0	8.9	0.19	17	30	3	3.30492	1.65246	0	NGO	0
105	GG	CC	3	3	GC	GC	2	2	2	1	1	4	0	1374.3			5.9	19.5	0	1	4.7	13.3	38.9	6.5	54.6	5.2	0.9	7.3	2.91	66.8	20.3	30.4	17.6	106					1	7.3	0.077	18.8	7	0.7	0.447541	0.22377	1	Salmonella Gp B	1
90	GT	CT	2	2	GC	TT	1	2	2	1	1	4	0	10786.8	0	0	6.5	20.3	0	0		9.2	41.7	15.4	42.9	3.8	1.4	3.9	2.46	82.3	26.5	32.2	20.4	176	45	52	3	0	0	7.1	0.126	18	85	8.5	5.65738	2.82869	0	Staphylococcus sp.	1
97	GG	CC	3	3	GC	GC	2	2	2	1	1	4	0	6514.8	4	1	6.2	19.7	0	0	4.83	10.3	66.6	10.3	23.1	6.9	1.1	2.4	2.5	78.6	25	31.8	24.7	138	76	24	0	0	1	7.5	0.104	18.6	138	13.8	8.91344	4.45672	0	Staphylococcus aureus	1
239	GT	CT	2	2	GC	TT	1	2	2	1	0	4	0	60522	0	0	9.5	28.1	0	0	6.2	13.1	44.2	3.1	52.7	5.8	0	6.9	4.41	63.7	21.5	33.8	20.2	161					0	8.7	0.141	16.5	10	1	0.921311	0.460656	1	NGO	0
189	GG	CC	3	3	GC	GC	2	2	2	1	0	4	0	24030	5	2	15.2	49.1	0	0		7.4	54.5	8.9	36.6	4	0.7	2.7	6.25	78.7	24.4	31	13.5	360	60	38	2	0	0	6.7	0.242	16.5	43	4.3	6.9223	3.46115	0	NGO	0
273	GG	CC	3	3	GC	GC	2	2	2	1	0	4	0	2429.7	0	0	8.1	25.2	0	0		11.7	45.9	8.3	45.8	5.4	1	5.4	4.16	60.6	19.4	32.1	23.3	173	53	44	3	0	0	8.3	0.143	18.7	63	6.3	5.20525	2.60262	0	NGO	0
36	GT	CC	2	3	GC	TC	2	1	2	1	1	4	0	22641.6	1	0	10.5	30.9	0	0		9.8	43.9	9.8	46.3	4.3	1	4.5	4.32	71.5	24.3	34	19.8	221	48	44	8	0	0	8.3	0.184	16.7	32	3.2	3.24197	1.62098	0	NGO	0
312	GG	CC	3	3	GC	GC	2	2	2	1	0	4	0	15372	0	0	5.6	19.8	0	1	5	4.2	71.9	7.7	20.4	3	0.3	0.9	2.71	72.9	20.8	28.5	19.1	79					1	8.3	0.065	16.6	23	2.3	1.49311	0.746557	1	NGO	0
68	GG	CC	3	3	GC	GC	2	2	2	1	1	4	0	20532.3	0	0	8.4	25.5	0	0		10.8	48.1	6.4	45.5	5.2	0.7	4.9	3.33	76.7	25.2	32.8	19.9	148	52	46	2	0	1	7.3	0.109	17	39	3.9	3.26066	1.63033	0	NGO	0
250	GG	CC	3	3	GC	GC	2	2	2	1	0	4	0	25952.4	4	0	8.9	26.1	0	0		14.3	42.8	6.6	50.6	6.1	0.9	7.2	3.9	66.9	22.8	34	18.4	97	47	51	2	0	1	9.6	0.094	18.9	9	0.9	0.770164	0.385082	1	NGO	0
94	GG	CC	3	3	GC	GC	2	2	2	1	1	4	0	25	0	0	6.3	22.6	0	0	4.6	5.6	49.8	11.3	38.9	2.8	0.6	2.2	2.9	77.8	21.5	27.7	21.4	133	55	38	7	0	1	9.9	0.132	16.7	23	2.3	1.70426	0.852131	1	Salmonella enteridis	1
327	GT	CC	2	3	GC	TC	2	1	2	1	0	4	0	78604.8	4	0	5.2	15.7	0	1	10.4	7.5	28.9	7.5	63.6	2.2	0.6	4.8	2.24	70.1	23.2	33.1	19	128	33	58	9	0	1	7.7	0.099	15.5	19	1.9	0.978033	0.489016	1	Staphylococcus aureus	1
183	GT	CT	2	2	GC	TT	1	2	2	1	1	4	0	3738	4	3	3.4	9.7	1	1	9.6	24.2	26.6	4.9	68.5	6.4	1.2	16.6	1.51	64.3	22.2	34.5	19.6	125	33	61	6	0	1	9.4	0.118	16.6	11	1.1	0.349836	0.174918	1	Pseudomonas aeroginosa	1
109	TT	TT	1	1	TT	TT	1	2	2	2	1	4	0	156	0	0	5.9	19.7	0	1	5.2	6.7	36.7	11.7	51.6	2.5	0.8	3.5	2.67	73.9	22.1	29.8	26.5	237	40	50	10	0	0	8.7	0.207	17.7	44	4.4	2.84197	1.42098	1	Salmonella typhimurium	1
202	GG	CC	3	3	GC	GC	2	2	2	1	0	4	0	5663	0	0	11.6	33.9	0	0		13.8	47.4	8.2	44.4	6.5	1.1	6.1	4.22	80.4	27.4	34.1	16.5	355	52	45	3	0	0	7.5	0.268	18.1	2	0.2	0.222295	0.111148	0	NGO	0
243	GG	CC	3	3	GC	GC	2	2	2	1	0	4	0	2322.9	1	0	9.4	30.3	0	0	5.05	7.5	47.7	2.5	49.8	3.6	0.2	3.7	4.61	65.8	20.3	30.9	20.5	81	53	46	1	0	1	7.3	0.059	16.3	14	1.4	1.39082	0.69541	1	Staphylococcus aureus	1
282	GT	CT	2	2	GC	TT	1	2	2	1	0	4	0	14711.7	0	0	7.3	23.4	0	0		7.2	57.9	10.3	31.8	4.2	0.7	2.3	3.21	72.7	22.6	31.1	20.7	101	65	32	3	0	1	8.8	0.089	17.7	41	4.1	3.14557	1.57279	1	NGO	0
17	GT	CC	2	3	GC	TC	2	1	2	1	1	4	0	425			11.4	37.4	0	0	5.1	12.3	56.8	7.5	35.7	7	0.9	4.4	4.49	83.2	25.3	30.4	15.3	355					0	7	0.249	16.7	1	0.1	0.122623	0.0613115	0	NGO	0
218	GG	CC	3	3	GC	GC	2	2	2	1	0	4	0	77700			11.1	34.1	0	0	4.7	10.5	38.9	5.7	55.4	4.1	0.6	5.8	4.94	69.1	22.4	32.4	16.3	188					0	6.7	0.125	16.1	6	0.6	0.67082	0.33541	0	NGO	0
35	GG	CC	3	3	GC	GC	2	2	2	1	1	4	0	7778	0	0	10.7	31.5	0	0		19.9	41.9	14.1	44	8.3	2.8	8.8	4.72	66.7	22.6	33.9	15.9	272	51	44	5	0	0	9	0.246	16.4	8	0.8	0.82623	0.413115	1	NGO	0
234	GG	CT	3	2	GC	GT	2	2	1	1	0	4	0	33321.6	0	0	10	30.7	0	0	6.3	17.6	57.5	8	34.5	10.1	1.4	6.1	4.26	72.1	23.4	32.4	22.5	260	65	33	2	0	0	9.7	0.253	17.7	9	0.9	0.905902	0.452951	1	Encherichia coli	1
244	GG	CC	3	3	GC	GC	2	2	2	1	0	4	0	54080	0	0	9.3	32.3	0	0	8.2	16.9	10.4	1.9	87.7	1.8	0.3	14.8	4.92	65.7	18.8	28.7	19.5	235					0	8.2	0.192	18.4	12	1.2	1.27082	0.63541	1
248	GT	CT	2	2	GC	TT	1	2	2	1	0	4	0	720	0	0	9	29.5	0	0	4.8	7.2	46	7.3	46.7	3.3	0.5	3.4	3.63	81.3	24.8	30.5	19	64					1	8.5	0.055	17.6	6	0.6	0.580328	0.290164	1	NGO	0
114	GG	CC	3	3	GC	GC	2	2	2	1	1	4	0	213	19	0	5.8	17.3	0	1	6.61	13.3	50.7	13.2	36.1	6.7	1.8	4.8	3.01	57.6	19.2	33.3	20.4	164	55	40	5	0	0	10.4	0.17	17.8	41	4.1	2.32557	1.16279	1	Salmonella enteridis	1
343	GT	CC	2	3	GC	TC	2	1	2	1	0	4	0	8996.3	0.33	0	4.8	15.5	1	1	6.6	13.7	43.9	5	51.1	6	0.7	7	2.31	66.9	20.8	31	16.9	67					1	7.7	0.051	16.5	8	0.8	0.406557	0.203279	1	NGO	0
66	GG	CC	3	3	GC	GC	2	2	2	1	1	4	0	5610			8.5	28.4	0	0	5.9	6.6	43.4	7.5	49.1	2.9	0.5	3.2	4.23	67.1	20	29.8	20.9	81					1	8.3	0.067	17.9	11	1.1	1.02426	0.512131	1	Staphylococcus (coagulase neg)	1
352	GG	CC	3	3	GC	GC	2	2	2	1	0	4	0	7849.8	3	1	4.1	13.7	1	1	4.9	10	35.6	7	57.4	3.6	0.7	5.7	2.19	62.6	18.8	30	29.2	79	38	61	1	0	1	6.7	0.053	14.9	19	1.9	0.853443	0.426721	1	NGO	0
113	GG	CC	3	3	GC	GC	2	2	2	1	1	4	0	9211.5	0	0	5.8	19.1	0	1	7.2	8.6	45.1	8.8	46.1	3.9	0.8	4	3.37	56.7	17.3	30.5	22.9	132	45	45	10	0	1	12	0.158	17.6	9	0.9	0.563607	0.281803	1	Salmonella typhimurium	1
58	GT	CT	2	2	GC	TT	1	2	2	1	1	4	0	5073	0	0	8.8	26.5	0	0		8.5	46.2	12	41.8	3.9	1	3.6	3.81	69.4	23	33.1	19.8	261	50	42	8	0	0	7.1	0.186	16.9	42	4.2	3.64918	1.82459	0	NGO	0
111	TT	CC	1	3	TC	TC	2	1	2	2	1	4	0	39809.7	1	0	5.8	18.7	0	1	4.7	5	51.8	13.8	34.4	2.6	0.7	1.7	1.89	98.6	30.5	30.9	23	67	53	42	5	0	1	9.5	0.064	17.9	104	10.4	6.37639	3.1882	0	NGO	0
110	GG	CC	3	3	GC	GC	2	2	2	1	1	4	0	85119.6	5	0	5.8	17.8	0	1		17.7	30.1	6.7	63.2	5.3	1.2	11.2	2.62	67.8	22	32.4	22.9	156	35	64	1	0	0	8.6	0.135	16.3	118	11.8	6.88656	3.44328	0	NGO	0
224	GG	CC	3	3	GC	GC	2	2	2	1	0	4	0	12522.5	0	0	11	36.3	0	0	5	9.6	61.3	7.9	30.8	5.9	0.8	3	5.82	62.4	18.8	30.2	20.6	475					0	6	0.285	16.2	5	0.5	0.595082	0.297541	0	NGO	0
321	GG	CC	3	3	GC	GC	2	2	2	1	0	4	0	25738.8	3	0	5.4	16.8	0	1	4.55	7	52	5.8	42.2	3.6	0.4	3	2.68	62.6	20	31.9	19.7	148	51	48	1	0	1	8.4	0.125	18.2	40	4	2.20328	1.10164	1	NGO	0
201	GG	CC	3	3	GC	GC	2	2	2	1	0	4	0	97820			11.6	36.8	0	0	4.2	14.6	11.2	5.8	83	1.6	0.8	12.1	4.63	79.5	25	31.5	16.2	156					0	5.8	0.091	16.4	8	0.8	0.965246	0.482623	0	NGO	0
342	GG	CC	3	3	GC	GC	2	2	2	1	0	4	0	15400	0	0	4.8	15.5	1	1	4.7	7.7	36.9	4.3	58.8	2.8	0.3	4.5	2.12	72.9	22.7	31.1	21.3	90					1	7.2	0.065	16.6	32	3.2	1.62623	0.813115	1	Gram positive rods	0
221	GG	CC	3	3	GC	GC	2	2	2	1	0	4	0	280140	0	0	11	36.2	0	0	3.6	13.8	20	4.7	75.3	2.8	0.6	10.4	4.89	73.9	22.6	30.5	16.4	91					1	6.7	0.061	16.7	7	0.7	0.83082	0.41541	0	NGO	0
32	GG	CC	3	3	GC	GC	2	2	2	1	1	4	0	50400	0	0	11	34.6	0	0	7	12.6	31.8	5.3	62.9	4	0.7	7.9	5.08	68.1	21.7	31.8	18.5	114					1	8.5	0.098	17	3	0.3	0.340328	0.170164	0	Salmonella Gp B	1
135	GG	CC	3	3	GC	GC	2	2	2	1	1	4	0	55162.2	2	3	5.2	16	0	1		5	50	10.6	39.4	2.5	0.5	2	2.5	63.9	20.6	32.3	22.6	92	56	40	4	0	1	8.8	0.081	17.8	17	1.7	0.891803	0.445902	1	NGO	0
162	TT	CC	1	3	TC	TC	2	1	2	2	1	4	0	78	0	0	4.6	13.4	1	1	6.8	7.9	64.8	6	29.2	5.1	0.5	2.3	1.19	112	38.7	34.6	22.3	90	70	27	3	0	1	7.4	0.067	16.7	64	6.4	2.8118	1.4059	1	Staphylococcus aureus	1
249	GG	CC	3	3	GC	GC	2	2	2	1	0	4	0	104718	0	0	8.9	28.5	0	0	4.2	9.3	52.9	6.8	40.3	4.9	0.6	3.7	3.55	80.5	25.2	31.3	15.8	47					1	8	0.038	17.5	8	0.8	0.747541	0.37377	1	NGO	0
42	GG	CC	3	3	GC	GC	2	2	2	1	1	4	0	42120	0	0	10	33.2	0	0	6.5	9	20.5	4.4	75.1	1.8	0.4	6.8	5.06	65.6	19.8	30.1	15	126					1	7.8	0.098	16	17	1.7	1.85049	0.925246	1	NGO	0
259	GG	CC	3	3	GC	GC	2	2	2	1	0	4	0	19544.4	6	0	8.6	27.7	0	0		19.3	31.8	7.2	61	6.1	1.4	11.8	5.4	51.4	15.9	31	29.4	190	36	62	2	0	0	8	0.152	16.8	2	0.2	0.181639	0.0908197	1	NGO	0
62	GT	CC	2	3	GC	TC	2	1	2	1	1	4	0	937440			8.6	31.2	0	0	7.4	12.6	43.4	2.6	54	5.5	0.3	6.8	4.97	62.9	17.3	27.5	21.1	168					0	7.7	0.129	16.7	10	1	1.02295	0.511475	1	NGO	0
73	GG	CC	3	3	GC	GC	2	2	2	1	1	4	0	5420.1	0	0	7.9	28.2	0	0		10.9	56.7	10.7	32.6	6.2	1.2	3.6	4.18	67.5	19	28.2	21.4	221	60	34	6	0	0	8.9	0.197	17.2	25	2.5	2.31148	1.15574	1	NGO	0
185	GT	CC	2	3	GC	TC	2	1	2	1	1	4	0	2349.6	11	0	3.1	11	1	1	3.5	20.9	50.8	4.9	44.3	10.6	1	9.3	1.5	73.6	20.5	27.8	35.9	506	48	51	1	0	0	7	0.356	18.1	201	20.1	7.24918	3.62459	0	NGO	0
40	GG	CC	3	3	GC	GC	2	2	2	1	1	4	0	138060			10.1	32	0	0	3.3	13	22.5	3.3	74.2	2.9	0.4	9.6	4.69	68.2	21.6	31.6	22.7	185					0	6.8	0.125	17	10	1	1.04918	0.52459	1	Staphylococcus aureus	1
71	GG	CC	3	3	GC	GC	2	2	2	1	1	4	0	20800	0	0	8.2	26.8	0	0	3.8	12	24.4	3.4	72.2	2.9	0.4	8.7	3.66	73.1	22.5	30.7	18.3	108					1	8.1	0.087	16.6	5	0.5	0.439344	0.219672	1	NGO	0
195	GG	CC	3	3	GC	GC	2	2	2	1	0	4	0	5663			12.2	39.8	0	0	5.3	9.4	26.4	8.5	65.1	2.5	0.8	6.1	5.07	78.5	24	30.6	15.6	355					0	6.3	0.223	16	8	0.8	1.04393	0.521967	0	NGO	0
13	GG	CC	3	3	GC	GC	2	2	2	1	1	4	0	424760	0	0	11.5	38.4	0	0	5.3	8.2	21.2	4.6	74.2	1.7	0.4	6.1	5.4	71.1	21.3	30	19.6	170					0	7	0.12	18	5	0.5	0.629508	0.314754	0	NGO	0
186	GG	CC	3	3	GC	GC	2	2	2	1	1	4	0	111339	0	0	3	9.3	1	1	3.9	15.3	15.3	2.3	82.4	2.3	0.4	12.6	1.12	83	27	32.6	21.6	92	23	77	0	0	1	7.4	0.068	17.5	13	1.3	0.396393	0.198197	1	NGO	0
348	GG	CC	3	3	GC	GC	2	2	2	1	0	4	0	331	0	0	4.6	15.9	1	1	5.8	9.2	42.2	13.7	44.1	3.9	1.3	4.1	2.41	65.9	19.2	29.2	23	130	48	47	5	0	1	9.6	0.125	19.5	29	2.9	1.5118	0.755902	1	Salmonella typhimurium	1
49	GG	CC	3	3	GC	GC	2	2	2	1	1	4	0	17266	0	0	9.5	32.2	0	0	4	9.7	35.8	1.5	62.7	3.5	0.1	6.1	4	80.4	23.8	29.6	18	329					0	5.8	0.192	16.3	9	0.9	0.950164	0.475082	1	Staphylococcus (coagulase neg)	1
115	GG	CC	3	3	GC	GC	2	2	2	1	1	4	0	556	0	0	5.8	19.2	0	1	2.89	2.2	58.8	15	26.2	1.3	0.3	0.6	2.83	68	20.6	30.3	20.2	92	64	30	6	0	1	11.7	0.107	17.6	26	2.6	1.63672	0.818361	1	Salmonella enteridis	1
7	GG	CC	3	3	GC	GC	2	2	2	1	1	4	0	158100	0	0	12	39.5	0	0	3.4	25.5	15.5	3.1	81.4	4	0.8	20.8	4.93	80.1	24.4	30.5	15.5	152					0	6.7	0.101	15.6	14	1.4	1.81311	0.906557	0	NGO	0
220	GG	CC	3	3	GC	GC	2	2	2	1	0	4	0	3211	0	0	11.1	35.2	0	0	5.5	13.5	60	2.8	37.2	8.1	0.4	5	4.8	73.4	23	31.4	15	101					1	8.4	0.085	15.6	4	0.4	0.461639	0.23082	0	NGO	0
204	GG	CC	3	3	GC	GC	2	2	2	1	0	4	0	12148.5	0	0	11.6	36.9	0	0	6.3	8.7	43.6	3.5	52.9	3.8	0.3	4.6	5.03	73.4	23	31.4	15.5	249					0	6.9	0.173	15.8	3	0.3	0.362951	0.181475	0	NGO	0
14	GG	CC	3	3	GC	GC	2	2	2	1	1	4	0	36552.3	0	0	11.5	34.3	0	0	5	15.5	32.3	4.4	63.3	5	0.7	9.8	4.42	77.5	25.9	33.4	16.2	129	37	62	1	0	1	7.9	0.102	16.6	5	0.5	0.562295	0.281148	0	NGO	0
141	GT	CC	2	3	GC	TC	2	1	2	1	1	4	0	24920	0.67	0	5.1	16.3	0	1	5.3	17.8	40.2	2.2	57.6	7.2	0.4	10.3	2.09	77.6	24.5	31.6	14.6	126					1	9	0.113	18	7	0.7	0.374098	0.187049	1	NGO	0
132	GG	CC	3	3	GC	GC	2	2	2	1	1	4	0	470527	0	0	5.2	16.9	0	1	6.9	16.3	36.2	3.4	60.4	5.9	0.6	9.8	2.38	71.2	21.8	30.5	22	153					0	6.6	0.101	19	13	1.3	0.720328	0.360164	1	NGO	0
150	GT	CC	2	3	GC	TC	2	1	2	1	1	4	0	31959.9	1	0	4.8	16.2	1	1	3.8	6.5	56.1	10.1	33.8	3.6	0.7	2.2	2.2	73.4	21.8	29.7	26.2	154	59	38	3	0	0	8.6	0.134	18	92	9.2	4.88656	2.44328	0	NGO	0
117	GG	CC	3	3	GC	GC	2	2	2	1	1	4	0	86500			5.7	18.9	0	1	6.7	15	38.1	5.9	56	5.7	0.9	8.4	2.6	72.9	22	30.2	20.5	242					0	7.6	0.184	17	24	2.4	1.48721	0.743607	1	NGO	0
310	GT	CC	2	3	GC	TC	2	1	2	1	0	4	0	240460	19	0	5.6	18.4	0	1	5.1	8.2	49.5	6.1	44.4	4.1	0.5	3.6	2.69	68.3	20.9	30.5	20.4	125	50	38	12	0	1	8.4	0.106	16.3	14	1.4	0.84459	0.422295	1	NGO	0
101	GT	CC	2	3	GC	TC	2	1	2	1	1	4	0	47560			5.9	20.3	0	1	4.2	12.3	49.1	10.3	40.6	6	1.3	5	3.2	63.3	18.4	29.1	20.3	151					0	10.6	0.16	17.5	17	1.7	1.13148	0.565738	1	NGO	0
191	TT	CC	1	3	TC	TC	2	1	2	2	0	4	0	4218.6	0	0	13.4	39.9	0	0	5	12.4	29.3	4.2	66.5	3.6	0.5	8.2	5.18	76.9	25.9	33.7	18	283	32	68	0	0	0	8.5	0.242	15.8	38	3.8	4.97115	2.48557	0	NGO	0
237	GG	CC	3	3	GC	GC	2	2	2	1	0	4	0	22614.9	0	0	9.7	29	0	0		5.9	22.6	5.2	72.2	1.3	0.3	4.3	4.22	68.8	23	33.5	20.6	105	34	56	0	0	1	8.1	0.086	17.3	11	1.1	1.0459	0.522951	1	NGO	0
193	GG	CC	3	3	GC	GC	2	2	2	1	0	4	0	478	0	0	12.7	41.9	0	0	5.4	6.6	49.9	3.8	46.3	3.3	0.3	3.1	5.41	77.5	23.5	30.3	15.5	317					0	6.1	0.193	15.9	10	1	1.37377	0.686885	0	Staphylococcus (coagulase neg)	1
217	GG	CC	3	3	GC	GC	2	2	2	1	0	4	0	251980	0.33	0	11.1	35.3	0	0	3.7	8.6	25.7	5.1	69.2	2.2	0.4	6	4.98	71	22.2	31.3	17.5	124					1	6.5	0.08	15.2	6	0.6	0.694426	0.347213	0	NGO	0
142	GG	CC	3	3	GC	GC	2	2	2	1	1	4	0	38070	0	0	5	16.3	0	1	5	9.4	40.2	5	54.8	3.8	0.5	5.2	2.51	64.9	20	30.7	17.5	58					1	6.4	0.037	15.7	13	1.3	0.694754	0.347377	1	NGO	0
25	GG	CC	3	3	GC	GC	2	2	2	1	1	4	0	516000	0	0	11.1	37.6	0	0	1.1	8.6	21.3	5.7	73	1.8	0.5	6.3	5.26	71.5	21.1	29.5	20.3	184					0	7	0.129	17.3	12	1.2	1.47934	0.739672	0	NGO	0
246	GT	CT	2	2	GC	TT	1	2	2	1	0	4	0	1121.4	0	0	9.1	27.7	0	0		6.5	58.3	15.3	26.1	3.8	1	1.7	3.99	69.5	22.9	32.9	17.8	96	64	28	8	0	1	6.9	0.67	16.9	45	4.5	4.08689	2.04344	0	NGO	0
338	GG	CC	3	3	GC	GC	2	2	2	1	0	4	0	10070	0	0	4.9	17.4	1	1	3.9	26.5	38.5	9	52.5	10.2	2.4	13.9	2.07	83.8	23.7	28.2	30.3	305					0	7	0.215	18	19	1.9	1.08393	0.541967	1	NGO	0
260	GT	CC	2	3	GC	TC	2	1	2	1	0	4	0	100320	0	0	8.5	27.4	0	0	3.6	9.6	37.7	4.2	58.1	3.6	0.4	5.6	3.72	73.7	23	31.2	19.1	85					1	8.4	0.072	16.3	7	0.7	0.628852	0.314426	1	NGO	0
52	GG	CC	3	3	GC	GC	2	2	2	1	1	4	0	85173	0	0	9.3	27.4	0	0		9.4	41.1	7.3	51.6	3.9	0.7	4.9	3.46	79.2	26.9	34	15.6	60	48	50	2	0	1	8	0.048	17.2	5	0.5	0.44918	0.22459	1	NGO	0
270	GG	CC	3	3	GC	GC	2	2	2	1	0	4	0	566916	0.33	4.33	8.1	28.3	0	0	1.6	20.4	12.8	3.3	83.9	2.6	0.7	17.1	4.45	63.5	18.3	28.8	22.9	163					0	7	0.114	16.4	9	0.9	0.835082	0.417541	1	NGO	0
288	GG	CC	3	3	GC	GC	2	2	2	1	0	4	0	320.4	2	0	6.4	19.1	0	0	4	9.7	66.7	12.1	21.2	6.5	1.2	2.1	2.31	82.9	27.7	33.4	21.2	160	69	23	8	0	0	7.5	0.121	18.1	23	2.3	1.44033	0.720164	1	NGO	0
355	GT	CT	2	2	GC	TT	1	2	2	1	0	4	0	222112	0	0	3.8	14	1	1	6.2	8.8	34.1	1.4	64.5	3	0.1	5.7	2.37	59.1	16.2	27.3	20.6	54					1	7.6	0.041	17.4	14	1.4	0.642623	0.321311	1	NGO	0
20	TT	CC	1	3	TC	TC	2	1	2	2	1	4	0	698	0	0	11.3	36.3	0	0	4.8	13.1	35.3	17.6	47.1	4.6	2.3	6.2	5.21	69.6	21.7	31.2	15.3	353					0	6.6	0.232	17.8	10	1	1.19016	0.595082	0	NGO	0
360	GT	CT	2	2	GC	TT	1	2	2	1	0	4	0	46297.8	3	2	3.6	12.4	1	1	5.33	16.1	45.4	7.4	47.2	7.3	1.2	7.6	1.54	80.3	23.4	29.2	32	158	47	52	1	0	0	9.8	0.156	17.9	115	11.5	4.67541	2.3377	1	NGO	0
232	GT	TT	2	1	GT	TT	1	2	1	2	0	4	0	179883			10.4	35.4	0	0	5.8	23.7	8.9	1.8	89.3	2.1	0.4	21.2	5.09	69.6	20.5	29.5	19.9	173					0	8.3	0.144	16.9	6	0.6	0.696393	0.348197	1	NGO	0
213	GG	CC	3	3	GC	GC	2	2	2	1	0	4	0	692			11.3	37.1	0	0	6.8	16.1	54	4.7	41.3	8.7	0.8	6.6	5.8	64	19.5	30.4	16.7	509					0	7.8	0.396	18.5	4	0.4	0.486557	0.243279	0	NGO	0
180	GG	CC	3	3	GC	GC	2	2	2	1	1	4	0	44455.5	9	0	3.6	11.4	1	1	4.5	10.3	51.3	10.9	37.8	5.3	1.1	3.9	1.53	74.6	23.5	31.5	19	195	50	33	17	0	0	7.8	0.153	17.4	56	5.6	2.09311	1.04656	1	NGO	0
199	GG	CC	3	3	GC	GC	2	2	2	1	0	4	0	258	0	0	11.7	35.3	0	0		10.5	65.3	4.9	29.8	6.9	0.5	3.1	4.83	73	24.2	33.2	16.6	335	68	30	2	0	0	6.7	0.226	16.2	13	1.3	1.50459	0.752295	0	NGO	0
6	GT	CC	2	3	GC	TC	2	1	2	1	1	4	0	3578	0	0	12.2	35.8	0	0		7.8	46.7	3.6	49.7	3.6	0.3	3.9	4.82	74.2	25.3	34	14	341	50	50	0	0	0	6	0.205	15.7	37	3.7	4.34295	2.17148	0	NGO	0
24	GT	CT	2	2	GC	TT	1	2	2	1	1	4	0	576	0	0	11.2	36.9	0	0	3.7	11.4	55.2	7.2	37.6	6.3	0.8	4.3	4.83	76.4	23.1	30.3	19.8	309					0	6.5	0.2	16.1	4	0.4	0.483934	0.241967	0	NGO	0
215	GG	CC	3	3	GC	GC	2	2	2	1	0	4	0	4868.7			11.2	36.4	0	0	5.9	6.7	49.8	7.9	42.3	3.3	0.5	2.8	4.99	72.9	22.5	30.8	14.4	169					0	6.6	0.111	17.8	6	0.6	0.716066	0.358033	0	NGO	0
8	GG	CC	3	3	GC	GC	2	2	2	1	1	4	0	16100.1	0	0	12	35.6	0	0	4	13.5	25.3	3.1	71.6	3.4	0.4	9.7	4.18	85.3	28.7	33.7	16	222	30	70	0	0	0	7.1	0.158	17.4	47	4.7	5.4859	2.74295	0	NGO	0
104	GG	CC	3	3	GC	GC	2	2	2	1	1	4	0	2856.9	4	0	5.9	21.6	0	1	4.1	7.5	45.8	6.9	47.3	3.4	0.5	3.5	4.11	52.5	14.5	27.6	24.5	24	49	48	3	0	1	5	0.012	13.9	37	3.7	2.62033	1.31016	1	Staphylococcus aureus	1
188	GG	CC	3	3	GC	GC	2	2	2	1	1	4	0	7956.7	0	0	2.3	6.7	1	1	6.3	43.4	44.1	3.3	52.6	19.1	1.4	22.8	0.73	91.8	31.1	33.9	21	66					1	6.3	0.041	16.1	250	25	5.4918	2.7459	0	NGO	0
196	GG	CC	3	3	GC	GC	2	2	2	1	0	4	0	39676.2	0	0	11.9	35.2	0	0	6.1	18.1	20.1	4.5	75.4	3.6	0.8	13.6	5.17	68.1	23	33.8	17.1	209	26	74	0	0	0	7.1	0.149	17.1	15	1.5	1.73115	0.865574	0	NGO	0
331	GG	CC	3	3	GC	GC	2	2	2	1	0	4	0	144367	7	1	5.1	17.3	0	1	4.2	10.2	32	14	54	3.3	1.4	5.5	2.3	75.2	22.3	29.7	22.4	238	40	49	11	0	0	7.5	0.179	16.5	63	6.3	3.57344	1.78672	1	NGO	0
165	GG	CC	3	3	GC	GC	2	2	2	1	1	4	0	18182.7	3	1	4.5	15.8	1	1	6.3	8.3	39.8	12.3	47.9	3.3	1	4	1.84	85.9	24.3	28.3	30.9	154	42	53	5	0	0	7.9	0.122	17.1	123	12.3	6.3718	3.1859	0	NGO	0
158	GG	CC	3	3	GC	GC	2	2	2	1	1	4	0	101967	2	0	4.6	13.7	1	1	5.9	6.6	39.4	7.1	53.5	2.6	0.5	3.5	2.21	62	20.6	33.2	15.4	66	43	55	2	0	1	9.7	0.064	18.1	9	0.9	0.404262	0.202131	1	NGO	0
45	GG	CC	3	3	GC	GC	2	2	2	1	1	4	0	25830	0	0	9.7	31.8	0	0	2.4	6.3	27.8	6.9	65.3	1.8	0.4	4.1	4.09	77.7	23.8	30.6	18.7	100					1	7.3	0.073	16	8	0.8	0.834098	0.417049	1	NGO	0
16	GT	CC	2	3	GC	TC	2	1	2	1	1	4	0	41003			11.5	35.9	0	0	4	10.5	21.9	4.6	73.5	2.3	0.5	7.7	4.96	72.2	23.2	32.2	13.4	244					0	6.7	0.163	15.5	1	0.1	0.117705	0.0588525	0	NGO	0
5	TT	CT	1	2	TC	TT	1	1	2	2	1	4	0	483300	0	0	12.3	40	0	0	2.4	10.8	11.2	5.1	83.7	1.2	0.6	9	5.34	74.9	23.1	30.8	14	105					1	7.2	0.076	15.9	5	0.5	0.655738	0.327869	0	NGO	0
125	GG	CC	3	3	GC	GC	2	2	2	1	1	4	0	92480			5.4	21.6	0	1	5.5	9.6	35.9	7.1	57	3.4	0.7	5.5	3.52	61.3	15.5	25.2	33.9	202					0	8.7	0.176	16.9	21	2.1	1.48721	0.743607	1	NGO	0
[truncated: 46 more columns]
